# Supplementary material
Source: Research Square preprint supplement (doi:10.21203/rs.3.rs-10233105/v1)
Supplement: Supplementary file 2 [file 9c765d932cf3265376d412e7.xlsx]

## Sheet: SM3
Region	Municipality	Provider	Address	Latitude	Longitude	Patients	Bed Capacity	Type
Antioquia	APARTADO	Promotora Clinica Zona Franca de Uraba SAS	KR 100 # 43-770 LT C101	7.8831	-76.6327	Adult	10	Private
Antioquia	APARTADO	SERVIUCIS S.A.S.	Carrera 98 Número 103B-46/52/62	7.88776	-76.6296	Adult	8	Private
Antioquia	BELLO	ESPECIALIDADES MEDICAS METROPOLITANAS S.A.S.	Avenida 34 N° 51-03	6.3392	-75.5415	Adult	8	Private
Antioquia	BELLO	Fundación Clinica del Norte	Av 38 Dg 59 50	6.34305	-75.5461	Adult	17	Private
Antioquia	CAUCASIA	CLINICA PAJONAL S.A.S	DIAGONAL 2OC N° 12-68	7.98227	-75.2021	Adult	5	Private
Antioquia	ENVIGADO	PROMOTORA MEDICA LAS AMERICAS S.A	Transversal 27A - Sur No. 42B - 111	6.17887	-75.5837	Adult	6	Private
Antioquia	ENVIGADO	E.S.E. HOSPITAL MANUEL URIBE ANGEL	DG 31 # 36 A SUR - 80	6.16682	-75.5799	Neonatal	4	Public
Antioquia	ENVIGADO	E.S.E. HOSPITAL MANUEL URIBE ANGEL	DG 31 # 36 A SUR - 80	6.16682	-75.5799	Adult	14	Public
Antioquia	ENVIGADO	E.S.E. HOSPITAL MANUEL URIBE ANGEL	DG 31 # 36 A SUR - 80	6.16682	-75.5799	Adult	24	Public
Antioquia	ENVIGADO	CENTRO ONCOLOGICO DE ANTIOQUIA SA	Carrera 48 # 46 A Sur 107	6.16608	-75.6006	Adult	11	Private
Antioquia	ITAGUI	CLINICA ANTIOQUIA S.A.	CALLE 45 N° 49-02	6.17003	-75.6129	Adult	12	Private
Antioquia	ITAGUI	ESE HOSPITAL SAN RAFAEL-ITAGUI	KR 51A # 45-51	6.17164	-75.6132	Adult	9	Public
Antioquia	LA CEJA	CLINICA SAN JUAN DE DIOS LA CEJA	AVENIDA SAN JUAN DE DIOS LA CEJA	6.04348	-75.4277	Adult	17	Private
Antioquia	MEDELLIN	FUNDACION INSTITUTO NEUROLOGICO DE COLOMBIA	CALLE 55 N° 46-36	6.25247	-75.5634	Adult	8	Private
Antioquia	MEDELLIN	COMUNIDAD DE HERMANAS DOMINICAS DE LA PRESENTACION DE LA SANTISIMA VIRGEN DE TOURS PROVINCIA DE MEDELLIN	CRA 41 # 62-5	6.25541	-75.5563	Adult	6	Private
Antioquia	MEDELLIN	COMUNIDAD DE HERMANAS DOMINICAS DE LA PRESENTACION DE LA SANTISIMA VIRGEN DE TOURS PROVINCIA DE MEDELLIN	KR 20 # 2 SUR 185	6.19398	-75.5574	Pediatric	6	Private
Antioquia	MEDELLIN	COMUNIDAD DE HERMANAS DOMINICAS DE LA PRESENTACION DE LA SANTISIMA VIRGEN DE TOURS PROVINCIA DE MEDELLIN	KR 20 # 2 SUR 185	6.19398	-75.5574	Adult	14	Private
Antioquia	MEDELLIN	SOCIEDAD MEDICA ANTIOQUEÑA S.A. SOMA	CALLE 51 N° 45-93	6.24892	-75.5645	Adult	9	Private
Antioquia	MEDELLIN	HOSPITAL PABLO TOBON URIBE	CALLE 78B N° 69-240	6.27714	-75.5798	Pediatric	8	Private
Antioquia	MEDELLIN	HOSPITAL PABLO TOBON URIBE	CALLE 78B N° 69-240	6.27714	-75.5798	Adult	52	Private
Antioquia	MEDELLIN	CLINICA CARDIO VID	CALLE 78B N° 75-21	6.27906	-75.585	Pediatric	4	Private
Antioquia	MEDELLIN	CLINICA CARDIO VID	CALLE 78B N° 75-21	6.27906	-75.585	Adult	25	Private
Antioquia	MEDELLIN	INVERSIONES MEDICAS DE ANTIOQUIA S.A. CLINICA LAS VEGAS	CALLE 2 SUR N° 46-55	6.2032	-75.5764	Adult	18	Private
Antioquia	MEDELLIN	CORPORACION PARA ESTUDIOS EN SALUD CLINICA CES	CL 58 # 50 C- 2	6.25729	-75.5655	Adult	22	Private
Antioquia	MEDELLIN	PROMOTORA MEDICA LAS AMERICAS S.A	DIAGONAL 75B N° 2A-80	6.21411	-75.5947	Neonatal	5	Private
Antioquia	MEDELLIN	PROMOTORA MEDICA LAS AMERICAS S.A	DIAGONAL 75B N° 2A-80	6.21411	-75.5947	Pediatric	6	Private
Antioquia	MEDELLIN	PROMOTORA MEDICA LAS AMERICAS S.A	DIAGONAL 75B N° 2A-80	6.21411	-75.5947	Adult	35	Private
Antioquia	MEDELLIN	HOSPITAL GENERAL DE MEDELLIN LUZ CASTRO DE GUTIERREZ, EMPRESA SOCIAL DEL ESTADO	CARRERA 48 N° 32-102	6.23452	-75.573	Neonatal	10	Public
Antioquia	MEDELLIN	HOSPITAL GENERAL DE MEDELLIN LUZ CASTRO DE GUTIERREZ, EMPRESA SOCIAL DEL ESTADO	CARRERA 48 N° 32-102	6.23452	-75.573	Pediatric	5	Public
Antioquia	MEDELLIN	HOSPITAL GENERAL DE MEDELLIN LUZ CASTRO DE GUTIERREZ, EMPRESA SOCIAL DEL ESTADO	CARRERA 48 N° 32-102	6.23452	-75.573	Adult	48	Public
Antioquia	MEDELLIN	CLINICA MEDELLIN S.A.S.	Kr 65B #30-95	6.23287	-75.5843	Adult	27	Private
Antioquia	MEDELLIN	FUNDACION HOSPITALARIA SAN VICENTE DE PAUL	CALLE 64 CON CARRERA 51 D	6.26269	-75.5656	Pediatric	24	Private
Antioquia	MEDELLIN	FUNDACION HOSPITALARIA SAN VICENTE DE PAUL	CALLE 64 CON CARRERA 51 D	6.26269	-75.5656	Adult	63	Private
Antioquia	MEDELLIN	FUNDACION HOSPITALARIA SAN VICENTE DE PAUL	CALLE 64 CON CARRERA 51 D	6.26269	-75.5656	Adult (Burning)	17	Private
Antioquia	MEDELLIN	FUNDACION HOSPITALARIA SAN VICENTE DE PAUL	CALLE 64 CON CARRERA 51 D	6.26269	-75.5656	Pediatric (Burning)	15	Private
Antioquia	MEDELLIN	UNIVERSIDAD PONTIFICIA BOLIVARIANA	KR 72 A # 78 B 50	6.27686	-75.582	Neonatal	15	Private
Antioquia	MEDELLIN	UNIVERSIDAD PONTIFICIA BOLIVARIANA	KR 72 A # 78 B 50	6.27686	-75.582	Adult	6	Private
Antioquia	MEDELLIN	CLINICA DEL PRADO S.A.S	CL 19 A # 44-25	6.22246	-75.5748	Adult	10	Private
Antioquia	MEDELLIN	FUNDACION COLOMBIANA DE CANCEROLOGIA CLINICA VIDA	CARRERA 50 A Nº 64-42	6.2617	-75.5615	Adult	6	Private
Antioquia	MEDELLIN	FUNDACION COLOMBIANA DE CANCEROLOGIA CLINICA VIDA	DIAGONAL 80 No. 18 A 146	6.22471	-75.5992	Adult	7	Private
Antioquia	MEDELLIN	HOSPITAL ALMA MATER DE ANTIOQUIA	KR 51 B # 69-13	6.26646	-75.5638	Adult	55	Mixta
Antioquia	MEDELLIN	ESE HOSPITAL LA MARIA	CL 92EE # 67-61	6.2865	-75.5741	Adult	33	Public
Antioquia	MEDELLIN	PROMOTORA MEDICA Y ODONTOLOGICA DE ANTIOQUIA SA	Calle 53 N° 46-38 Piso 1,2,3,4,5,6,11,15	6.25099	-75.5643	Adult	17	Private
Antioquia	MEDELLIN	NUEVA CLINICA SAGRADO CORAZON S.A.S	CL 49 # 35 - 61	6.24289	-75.5573	Adult	12	Private
Antioquia	MEDELLIN	Corporación Hospital Infantil Concejo de Medellín	CL 72A # 48A-20	6.2682	-75.5588	Pediatric	8	Private
Antioquia	MEDELLIN	SUMIMEDICAL S.A.S	Carrera 49 No. 58 19	6.25593	-75.5632	Adult	11	Private
Antioquia	RIONEGRO	SOCIEDAD MEDICA RIONEGRO S.A. SOMER S.A.	CALLE 38 N° 54A-35	6.14065	-75.3777	Pediatric	3	Private
Antioquia	RIONEGRO	SOCIEDAD MEDICA RIONEGRO S.A. SOMER S.A.	CALLE 38 N° 54A-35	6.14065	-75.3777	Adult	14	Private
Antioquia	RIONEGRO	SERVIUCIS S.A.S.	CALLE 56 # 48 80	6.15843	-75.3717	Adult	10	Private
Antioquia	RIONEGRO	FUNDACION HOSPITAL SAN VICENTE DE PAUL RIONEGRO	VEREDA LA CONVENCION VIA AEROPUERTO LLANO GRANDE KM 2	6.15205	-75.4348	Adult	20	Private
Antioquia	SABANETA	AUG KAPITAL SAS.	CARRERA 46B#77SUR-36	6.14825	-75.6221	Adult	8	Private
Arauca	ARAUCA	ESE HOSPITAL SAN VICENTE DE ARAUCA	CALLE 15 CRA 16 ESQUINA	7.0822	-70.7531	Adult	7	Public
Atlántico	BARANOA	IPS CLINICA SANTA ANA DE BARANOA	CALLE 18 N° 20 - 59	10.7955	-74.9135	Adult	5	Private
Atlántico	BARANOA	CLINICA REINA CATALINA BARANOA	KM 1 FINCA LOS NAVARRITOS	10.8079	-74.916	Pediatric	3	Private
Atlántico	BARANOA	CLINICA REINA CATALINA BARANOA	KM 1 FINCA LOS NAVARRITOS	10.8079	-74.916	Adult	26	Private
Atlántico	BARANOA	CLINICA REINA CATALINA BARANOA	KM 1 FINCA LOS NAVARRITOS	10.8079	-74.916	Adult (Burning)	1	Private
Atlántico	BARANOA	CLINICA REINA CATALINA BARANOA	KM 1 FINCA LOS NAVARRITOS	10.8079	-74.916	Pediatric (Burning)	1	Private
Atlántico	LURUACO	CLINICA SAN JOSE DE LURUACO IPS SAS	CARRERA 20 NO. 20-30	10.609	-75.1401	Pediatric	4	Private
Atlántico	LURUACO	CLINICA SAN JOSE DE LURUACO IPS SAS	CARRERA 20 NO. 20-30	10.609	-75.1401	Adult	8	Private
Atlántico	MALAMBO	CLINICA MEDICO QUIRURGICA SAN PEDRO CLAVER SAS	CARRERA 22 # 10A-86	10.8539	-74.7773	Adult	10	Private
Atlántico	PUERTO COLOMBIA	CLINICA PORTOAZUL S.A SIGLA CPA	CR 30 CORREDOR UNIVERSITARIO N° 1 - 850	11.0155	-74.8468	Neonatal	6	Private
Atlántico	PUERTO COLOMBIA	CLINICA PORTOAZUL S.A SIGLA CPA	CR 30 CORREDOR UNIVERSITARIO N° 1 - 850	11.0155	-74.8468	Pediatric	3	Private
Atlántico	PUERTO COLOMBIA	CLINICA PORTOAZUL S.A SIGLA CPA	CR 30 CORREDOR UNIVERSITARIO N° 1 - 850	11.0155	-74.8468	Adult	6	Private
Atlántico	SABANALARGA	CLINICA SAN RAFAEL LTDA	CALLE 20 # 16-42	10.6298	-74.9201	Pediatric	3	Private
Atlántico	SABANALARGA	CLINICA SAN RAFAEL LTDA	CALLE 20 # 16-42	10.6298	-74.9201	Adult	6	Private
Atlántico	SABANALARGA	SAIS IPS SAS IMAGENOLOGIA Y HEMODINAMIA	CALLE 25 # 8-25 lo 1	10.6266	-74.9244	Neonatal	4	Private
Atlántico	SABANALARGA	SAIS IPS SAS IMAGENOLOGIA Y HEMODINAMIA	CALLE 25 # 8-25 lo 1	10.6266	-74.9244	Pediatric	3	Private
Atlántico	SABANALARGA	SAIS IPS SAS IMAGENOLOGIA Y HEMODINAMIA	CALLE 25 # 8-25 lo 1	10.6266	-74.9244	Adult	10	Private
Atlántico	SOLEDAD	CLINICA PORVENIR LIMITADA	CALLE 18 N° 34 - 18	10.9291	-74.764	Adult	10	Private
Atlántico	SOLEDAD	FUNDACION HOSPITAL UNIVERSIDAD DEL NORTE	CALLE 30 AUTOP AL AEROPUERTO AL LADO DEL PARQUE MUVDI	10.93	-74.7806	Adult	13	Private
Atlántico	SOLEDAD	CLINICA LOS ALMENDROS SAS	CRA 18D # 80A-24	10.9186	-74.8165	Pediatric	1	Private
Atlántico	SOLEDAD	CLINICA LOS ALMENDROS SAS	CRA 18D # 80A-24	10.9186	-74.8165	Adult	6	Private
Atlántico	SOLEDAD	FUNDACION CLINICA MATERNO INFANTIL ADELA DE CHAR	CALLE 47 ENTRE CARRERA 6 C Y 7	10.9017	-74.7828	Pediatric	3	Private
Atlántico	SOLEDAD	FUNDACION CLINICA MATERNO INFANTIL ADELA DE CHAR	CALLE 47 ENTRE CARRERA 6 C Y 7	10.9017	-74.7828	Adult	19	Private
Barranquilla	BARRANQUILLA	ORGANIZACION CLINICA GENERAL DEL NORTE	CARRERA 48 # 70-38	10.995	-74.8028	Neonatal	16	Private
Barranquilla	BARRANQUILLA	ORGANIZACION CLINICA GENERAL DEL NORTE	CARRERA 48 # 70-38	10.995	-74.8028	Pediatric	11	Private
Barranquilla	BARRANQUILLA	ORGANIZACION CLINICA GENERAL DEL NORTE	CARRERA 48 # 70-38	10.995	-74.8028	Adult	64	Private
Barranquilla	BARRANQUILLA	CLINICA JALLER S.A.S.	Calle 61 50-124	10.9941	-74.7948	Adult	10	Private
Barranquilla	BARRANQUILLA	CLINICA DE LA COSTA S.A.S.	CARRERA 50 # 80-90	11.0024	-74.8132	Neonatal	4	Private
Barranquilla	BARRANQUILLA	CLINICA DE LA COSTA S.A.S.	CARRERA 50 # 80-90	11.0024	-74.8132	Pediatric	8	Private
Barranquilla	BARRANQUILLA	CLINICA DE LA COSTA S.A.S.	CARRERA 50 # 80-90	11.0024	-74.8132	Adult	12	Private
Barranquilla	BARRANQUILLA	IPS CLINICA SAN IGNACIO LTDA	CALLE 76 # 6B-36	10.9469	-74.8216	Neonatal	11	Private
Barranquilla	BARRANQUILLA	IPS CLINICA SAN IGNACIO LTDA	CALLE 76 # 6B-36	10.9469	-74.8216	Adult	5	Private
Barranquilla	BARRANQUILLA	IPS CLINICA SAN IGNACIO LTDA	CALLE 76 # 6B-36	10.9469	-74.8216	Pediatric	4	Private
Barranquilla	BARRANQUILLA	CLINICA MEDIESP S.A.S.	CRA 49C 84 - 141	11.0038	-74.8198	Adult	4	Private
Barranquilla	BARRANQUILLA	ORGANIZACION CLINICA BONNADONA PREVENIR S.A.S.	CARRERA 49 C NO 82-70	11.0023	-74.8167	Pediatric	3	Private
Barranquilla	BARRANQUILLA	ORGANIZACION CLINICA BONNADONA PREVENIR S.A.S.	CARRERA 49 C NO 82-70	11.0023	-74.8167	Adult	49	Private
Barranquilla	BARRANQUILLA	IPS CLINICA REINA CATALINA S.A.S.	CALLE 82 No 47-12	11.0016	-74.8162	Pediatric	10	Private
Barranquilla	BARRANQUILLA	IPS CLINICA REINA CATALINA S.A.S.	CALLE 82 No 47-12	11.0016	-74.8162	Adult	41	Private
Barranquilla	BARRANQUILLA	IPS CLINICA REINA CATALINA S.A.S.	CALLE 82 No 47-12	11.0016	-74.8162	Adult (Burning)	1	Private
Barranquilla	BARRANQUILLA	IPS CLINICA REINA CATALINA S.A.S.	CALLE 82 No 47-12	11.0016	-74.8162	Pediatric (Burning)	3	Private
Barranquilla	BARRANQUILLA	CLINICA LA ASUNCION	CALLE 70B # 41-93	10.9898	-74.8071	Neonatal	8	Private
Barranquilla	BARRANQUILLA	CLINICA LA ASUNCION	CALLE 70B # 41-93	10.9898	-74.8071	Pediatric	2	Private
Barranquilla	BARRANQUILLA	CLINICA LA ASUNCION	CALLE 70B # 41-93	10.9898	-74.8071	Adult	14	Private
Barranquilla	BARRANQUILLA	CLINICAS ATENAS LTDA IPS	CALLE 80 No 49 C-10	11.0014	-74.813	Adult	8	Private
Barranquilla	BARRANQUILLA	CLINICA LA MERCED BARRANQUILLA SAS	CALLE 60 No 38-29	10.9837	-74.7982	Pediatric	2	Private
Barranquilla	BARRANQUILLA	CLINICA LA MERCED BARRANQUILLA SAS	CALLE 60 No 38-29	10.9837	-74.7982	Adult	12	Private
Barranquilla	BARRANQUILLA	CLINICA ALTOS DE SAN VICENTE S.A.S.	CARRERA 49C No. 86-46	11.0049	-74.8216	Adult	3	Private
Barranquilla	BARRANQUILLA	CLINICA ALTOS DE SAN VICENTE S.A.S.	CARRERA 49C No.87-12	11.0049	-74.8216	Adult	4	Private
Barranquilla	BARRANQUILLA	CLINICA DEL CARIBE S.A.	CALLE 80 No 49 C-65	11.0016	-74.813	Adult	16	Private
Barranquilla	BARRANQUILLA	CLINICA CENTRO S.A	CLLE 40 NO 41 - 110	10.9818	-74.7818	Adult	35	Private
Barranquilla	BARRANQUILLA	FUNDACION CAMPBELL	CALLE 31 No.14- 82	10.9526	-74.7875	Adult	15	Private
Barranquilla	BARRANQUILLA	CLINICA MURILLO - INVERCLINICAS S.A.	CLL 45 # 20 - 77	10.9607	-74.7939	Neonatal	6	Private
Barranquilla	BARRANQUILLA	CLINICA MURILLO - INVERCLINICAS S.A.	CLL 45 # 20 - 77	10.9607	-74.7939	Pediatric	1	Private
Barranquilla	BARRANQUILLA	CLINICA MURILLO - INVERCLINICAS S.A.	CLL 45 # 20 - 77	10.9607	-74.7939	Adult	9	Private
Barranquilla	BARRANQUILLA	DISAMA MEDIC S.A.S.	CALLA 80 No. 46-44	10.9995	-74.8139	Adult	7	Private
Barranquilla	BARRANQUILLA	CLINICA SAN MARTIN BARRANQUILLA LTDA	CARRERA 43 70-106	10.9912	-74.8057	Pediatric	5	Private
Barranquilla	BARRANQUILLA	CLINICA SAN MARTIN BARRANQUILLA LTDA	CARRERA 43 70-106	10.9912	-74.8057	Adult	8	Private
Barranquilla	BARRANQUILLA	MEDICLINICA SOLUCIONES INTEGRALES EN SALUD IPS S.A.S	carrera 47 numero 80-81	11.0002	-74.8146	Adult	8	Private
Barranquilla	BARRANQUILLA	CLINICA LA VICTORIA S.A.S.	CALLE 45 No.14-98	10.955	-74.7957	Adult	6	Private
Barranquilla	BARRANQUILLA	CLINICA GENERAL SAN DIEGO S.A.S.	CALLE 51 NO 39 - 07	10.9818	-74.7912	Adult	10	Private
Barranquilla	BARRANQUILLA	SOCIEDAD CLINICA IBEROAMERICA S.A.S.	CL 86 No 50 - 26	11.0056	-74.8205	Adult	6	Private
Barranquilla	BARRANQUILLA	SOCIEDAD CLINICA IBEROAMERICA S.A.S.	CL 71 No. 38 4	10.9852	-74.8099	Adult	14	Private
Barranquilla	BARRANQUILLA	OINSAMED S.A.S.	CR 74 No. 76-91	11.014	-74.7959	Pediatric	2	Private
Barranquilla	BARRANQUILLA	OINSAMED S.A.S.	CR 74 No. 76-91	11.014	-74.7959	Adult	25	Private
Barranquilla	BARRANQUILLA	SAIS IPS SAS IMAGENOLOGIA Y HEMODINAMIA	CARRERA 50 NO. 79 - 154 SOTANO 1	11.0016	-74.8117	Adult	10	Private
Barranquilla	BARRANQUILLA	CENTRO HOSPITALARIO REGIONAL SANTA MONICA SAS	CR 43 No 70-144	10.9914	-74.806	Pediatric	1	Private
Barranquilla	BARRANQUILLA	CENTRO HOSPITALARIO REGIONAL SANTA MONICA SAS	CR 43 No 70-144	10.9914	-74.806	Adult	7	Private
Barranquilla	BARRANQUILLA	MIRED BARRANQUILLA IPS S.A.S.	CALLE 33 No.33-09	10.9733	-74.7804	Adult	8	Mixta
Barranquilla	BARRANQUILLA	MIRED BARRANQUILLA IPS S.A.S.	CALLE 50 No.20-91	10.9652	-74.798	Pediatric	9	Mixta
Barranquilla	BARRANQUILLA	MIRED BARRANQUILLA IPS S.A.S.	CALLE 50 No.20-91	10.9652	-74.798	Adult	29	Mixta
Barranquilla	BARRANQUILLA	CLINICA INTERNATIONAL BARRANQUILLA S.A.S	CARRERA 50 NUMERO 82-228	11.0039	-74.817	Neonatal	10	Private
Barranquilla	BARRANQUILLA	CLINICA INTERNATIONAL BARRANQUILLA S.A.S	CARRERA 50 NUMERO 82-228	11.0039	-74.817	Pediatric	10	Private
Barranquilla	BARRANQUILLA	CLINICA INTERNATIONAL BARRANQUILLA S.A.S	CARRERA 50 NUMERO 82-228	11.0039	-74.817	Adult	15	Private
Barranquilla	BARRANQUILLA	ORTOCLINIC DEL CARIBE S.A.S.	CARRERA 50 No. 79 - 154	11.0016	-74.8117	Adult	5	Private
Barranquilla	BARRANQUILLA	CLINICA SANTA ANA DE DIOS S.A.S.	CALLE 70 B No. 41 - 187	10.9902	-74.8061	Pediatric	11	Private
Barranquilla	BARRANQUILLA	CLINICA SANTA ANA DE DIOS S.A.S.	CALLE 70 B No. 41 - 187	10.9902	-74.8061	Adult	15	Private
Barranquilla	BARRANQUILLA	CLINICA LA VIDA IPS S.A.S.	CALLE 110 No.4-30	10.9398	-74.8334	Adult	10	Private
Barranquilla	BARRANQUILLA	EMPRESA SOCIAL DEL ESTADO UNIVERSITARIA DEL ATLANTICO	CALLE 57 No.23-100	10.9707	-74.8007	Adult	8	Public
Bogotá D.C	BOGOTA	MEDICA MAGDALENA SAS	CALLE 39 No. 14-34	4.62708	-74.0692	Adult	1	Private
Bogotá D.C	BOGOTA	ASOCIACION DE AMIGOS CONTRA EL CANCER PROSEGUIR	CARRERA 16 No 59-04 / 54	4.64672	-74.0674	Adult	15	Private
Bogotá D.C	BOGOTA	FUNDACION HOSPITAL SAN CARLOS	KR 12D 32- 44 SUR	4.57256	-74.1059	Adult	20	Private
Bogotá D.C	BOGOTA	CAJA DE COMPENSACION FAMILIAR CAFAM	Calle 51 No. 15- 34	4.63877	-74.068	Adult	7	Private
Bogotá D.C	BOGOTA	CAJA DE COMPENSACION FAMILIAR CAFAM	CL 93 # 19 B 77 y CL 93 # 19 B 95	4.67925	-74.0572	Adult	11	Private
Bogotá D.C	BOGOTA	CAJA DE COMPENSACION FAMILIAR CAFAM	Avenida calle 127 # 16 A - 27	4.70398	-74.0447	Pediatric	7	Private
Bogotá D.C	BOGOTA	CAJA DE COMPENSACION FAMILIAR CAFAM	Avenida calle 127 # 16 A - 27	4.70398	-74.0447	Adult	6	Private
Bogotá D.C	BOGOTA	FUNDACION SANTA FE DE BOGOTA	CL 119 # 7 75	4.69571	-74.033	Pediatric	5	Private
Bogotá D.C	BOGOTA	FUNDACION SANTA FE DE BOGOTA	CL 119 # 7 75	4.69571	-74.033	Adult	37	Private
Bogotá D.C	BOGOTA	FUNDACION SANTA FE DE BOGOTA	CL 119 # 7 75	4.69571	-74.033	Adult (Burning)	4	Private
Bogotá D.C	BOGOTA	FUNDACION SANTA FE DE BOGOTA	CL 119 # 7 75	4.69571	-74.033	Pediatric (Burning)	3	Private
Bogotá D.C	BOGOTA	HOSPITAL UNIVERSITARIO CLINICA SAN RAFAEL	CRA 8 # 17 45 SUR	4.57635	-74.0913	Neonatal	1	Private
Bogotá D.C	BOGOTA	HOSPITAL UNIVERSITARIO CLINICA SAN RAFAEL	CRA 8 # 17 45 SUR	4.57635	-74.0913	Pediatric	10	Private
Bogotá D.C	BOGOTA	HOSPITAL UNIVERSITARIO CLINICA SAN RAFAEL	CRA 8 # 17 45 SUR	4.57635	-74.0913	Adult	50	Private
Bogotá D.C	BOGOTA	FUNDACION HOSPITAL DE LA MISERICORDIA	Avenida Carrera 14 No 1-65	4.59426	-74.0888	Pediatric	41	Private
Bogotá D.C	BOGOTA	ESE INSTITUTO NACIONAL DE CANCEROLOGIA	Cl 1 No 9-85	4.58805	-74.0845	Pediatric	6	Public
Bogotá D.C	BOGOTA	ESE INSTITUTO NACIONAL DE CANCEROLOGIA	Cl 1 No 9-85	4.58805	-74.0845	Adult	17	Public
Bogotá D.C	BOGOTA	FUNDACION ABOOD SHAIO	DIAG 115 A # 70 C 75	4.69828	-74.0731	Pediatric	7	Private
Bogotá D.C	BOGOTA	FUNDACION ABOOD SHAIO	DIAG 115 A # 70 C 75	4.69828	-74.0731	Adult	62	Private
Bogotá D.C	BOGOTA	CONGREGACION DE DOMINICAS DE SANTA CATALINA DE SENA	CL 45 F # 16 A 11	4.63437	-74.0708	Adult	15	Private
Bogotá D.C	BOGOTA	CLINICA DE LA MUJER S.A.S.	KR 19 C # 91 17	4.67773	-74.0573	Adult	4	Private
Bogotá D.C	BOGOTA	GARCIA PEREZ MEDICA Y COMPAÑIA SAS	CL 27 N° 24-40 PISO 1 INTERIOR 1, PISO 2, PISO 3, PISO 4	4.62291	-74.0769	Adult	8	Private
Bogotá D.C	BOGOTA	CAJA COLOMBIANA DE SUBSIDIO FAMILIAR COLSUBSIDIO	CALLE 66 # 10 - 48	4.65223	-74.0607	Pediatric	13	Private
Bogotá D.C	BOGOTA	CAJA COLOMBIANA DE SUBSIDIO FAMILIAR COLSUBSIDIO	CALLE 53 SUR # 79 D 71	4.6155	-74.173	Adult	20	Private
Bogotá D.C	BOGOTA	CAJA COLOMBIANA DE SUBSIDIO FAMILIAR COLSUBSIDIO	AC 100 # 23 - 59	4.68627	-74.0567	Adult	11	Private
Bogotá D.C	BOGOTA	CAJA COLOMBIANA DE SUBSIDIO FAMILIAR COLSUBSIDIO	Carrera 45 No. 94-67	4.68301	-74.0576	Adult	12	Private
Bogotá D.C	BOGOTA	CAJA COLOMBIANA DE SUBSIDIO FAMILIAR COLSUBSIDIO	CALLE 127 # 15A -73	4.704	-74.0442	Adult	9	Private
Bogotá D.C	BOGOTA	EUSALUD S.A	DG 54 # 16 A 16	4.64253	-74.0688	Neonatal	14	Private
Bogotá D.C	BOGOTA	EUSALUD S.A	DG 54 # 16 A 16	4.64253	-74.0688	Adult	2	Private
Bogotá D.C	BOGOTA	EUSALUD S.A	DG 54 # 16 A 16	4.64253	-74.0688	Adult	2	Private
Bogotá D.C	BOGOTA	EUSALUD S.A	KR 78 # 3 A 40	4.62765	-74.145	Adult	2	Private
Bogotá D.C	BOGOTA	INSTITUTO ROOSEVELT	CRA 4 ESTE # 17 50 AV CIRCUNVALAR	4.59872	-74.0642	Neonatal	4	Private
Bogotá D.C	BOGOTA	INSTITUTO ROOSEVELT	CRA 4 ESTE # 17 50 AV CIRCUNVALAR	4.59872	-74.0642	Pediatric	10	Private
Bogotá D.C	BOGOTA	SOCIEDAD DE CIRUGIA DE BOGOTA HOSPITAL DE SAN JOSE	CL 10 No. 18 - 75	4.60304	-74.0867	Neonatal	8	Private
Bogotá D.C	BOGOTA	SOCIEDAD DE CIRUGIA DE BOGOTA HOSPITAL DE SAN JOSE	CL 10 No. 18 - 75	4.60304	-74.0867	Pediatric	4	Private
Bogotá D.C	BOGOTA	SOCIEDAD DE CIRUGIA DE BOGOTA HOSPITAL DE SAN JOSE	CL 10 No. 18 - 75	4.60304	-74.0867	Adult	19	Private
Bogotá D.C	BOGOTA	CONGREGACION DE LAS HERMANAS DE LA CARIDAD DOMINICAS DE LA PRESENTACION DE LA SANTISIMA VIRGEN	Calle 45 C No. 22-02	4.63614	-74.0745	Adult	24	Private
Bogotá D.C	BOGOTA	CENTRO DE INVESTIGACIONES ONCOLOGICAS CLINICA SAN DIEGO CIOSAD SAS	AC 33 # 14 37	4.62159	-74.0704	Adult	14	Private
Bogotá D.C	BOGOTA	CLINICA JUAN N CORPAS LTDA	KR 111 # 159 A 61	4.76148	-74.0924	Adult	15	Private
Bogotá D.C	BOGOTA	FUNDACION CARDIO INFANTIL INSTITUTO DE CARDIOLOGIA	CL 163 A # 13 B 60	4.74145	-74.0345	Neonatal	10	Private
Bogotá D.C	BOGOTA	FUNDACION CARDIO INFANTIL INSTITUTO DE CARDIOLOGIA	CL 163 A # 13 B 60	4.74145	-74.0345	Pediatric	28	Private
Bogotá D.C	BOGOTA	FUNDACION CARDIO INFANTIL INSTITUTO DE CARDIOLOGIA	CL 163 A # 13 B 60	4.74145	-74.0345	Adult	67	Private
Bogotá D.C	BOGOTA	CPO S A	KR 20 23 23 SUR	4.58379	-74.1051	Neonatal	7	Private
Bogotá D.C	BOGOTA	CPO S A	KR 20 23 23 SUR	4.58379	-74.1051	Pediatric	3	Private
Bogotá D.C	BOGOTA	CPO S A	KR 20 23 23 SUR	4.58379	-74.1051	Adult	15	Private
Bogotá D.C	BOGOTA	CLINICA COLSANITAS S.A.	CR. 21 NO. 127 - 03 / AC 127 21 - 60 CN 106 AL 110, 202, 203, 210 A y B 211, 310, 316, 410 A y B, 424	4.70694	-74.052	Adult	9	Private
Bogotá D.C	BOGOTA	CLINICA COLSANITAS S.A.	CL23 66 46	4.64831	-74.1062	Adult	21	Private
Bogotá D.C	BOGOTA	CLINICA COLSANITAS S.A.	CL 73 A NO. 76 66	4.69235	-74.0981	Pediatric	13	Private
Bogotá D.C	BOGOTA	CLINICA COLSANITAS S.A.	CL 73 A NO. 76 66	4.69235	-74.0981	Adult	9	Private
Bogotá D.C	BOGOTA	EMPRESA SOCIAL DEL ESTADO HOSPITAL UNIVERSITARIO DE LA SAMARITANA	CRA 8 # 0 29 SUR	4.58748	-74.0837	Adult	21	Public
Bogotá D.C	BOGOTA	CLINICA DE MARLY S.A	CL 50 # 9 67	4.63683	-74.0651	Adult	10	Private
Bogotá D.C	BOGOTA	HOSPITAL UNIVERSITARIO SAN IGNACIO	CRA 7 # 40 62	4.62851	-74.0643	Pediatric	6	Private
Bogotá D.C	BOGOTA	HOSPITAL UNIVERSITARIO SAN IGNACIO	CRA 7 # 40 62	4.62851	-74.0643	Adult	26	Private
Bogotá D.C	BOGOTA	ADMINISTRADORA COUNTRY S.A.S	CRA 16 # 82 57	4.66875	-74.0568	Pediatric	6	Private
Bogotá D.C	BOGOTA	ADMINISTRADORA COUNTRY S.A.S	CRA 16 # 82 57	4.66875	-74.0568	Adult	18	Private
Bogotá D.C	BOGOTA	CLINICA DEL OCCIDENTE S.A.	AV DE LAS AMERICAS # 71 C 29	4.62952	-74.1357	Adult	30	Private
Bogotá D.C	BOGOTA	AAAA ACADEMIA ABSCRITA A ASOCIACION DE ESPECIALISTAS S.A.S	AV CARACAS # 30 51	4.61831	-74.0716	Adult	9	Private
Bogotá D.C	BOGOTA	FUNDACION HOSPITAL INFANTIL UNIVERSITARIO DE SAN JOSE	KR 52 # 67 A 71	4.66518	-74.0789	Pediatric	7	Private
Bogotá D.C	BOGOTA	FUNDACION HOSPITAL INFANTIL UNIVERSITARIO DE SAN JOSE	KR 52 # 67 A 71	4.66518	-74.0789	Adult	20	Private
Bogotá D.C	BOGOTA	HOSPITAL MILITAR CENTRAL	TV 3C No 49-02	4.63561	-74.0622	Pediatric	6	Public
Bogotá D.C	BOGOTA	HOSPITAL MILITAR CENTRAL	TV 3C No 49-02	4.63561	-74.0622	Adult	37	Public
Bogotá D.C	BOGOTA	CORPORACION HOSPITALARIA JUAN CIUDAD	CL 24 # 29 45	4.62353	-74.0827	Adult	70	Private
Bogotá D.C	BOGOTA	CORPORACION HOSPITALARIA JUAN CIUDAD	CL 66 A # 52 25	4.66371	-74.0799	Adult	6	Private
Bogotá D.C	BOGOTA	INSTITUTO DEL CORAZON DE BUCARAMANGA S.A.	AV CARACAS # 34 47	4.62358	-74.0696	Adult	9	Private
Bogotá D.C	BOGOTA	Medicentro Familiar IPS SAS	Calle 20 No. 98-62	4.67421	-74.1422	Adult	9	Private
Bogotá D.C	BOGOTA	CLINICA MEDICAL SAS	Calle 36 Sur No 77 - 33	4.62198	-74.1497	Adult	16	Private
Bogotá D.C	BOGOTA	CLINICA MEDICAL SAS	CALLE 1D No. 17A 35	4.59286	-74.09	Adult	10	Private
Bogotá D.C	BOGOTA	DIRECCION DE SANIDAD POLICIA NACIONAL	Cra. 59 No. 26 21 CAN	4.64735	-74.0974	Neonatal	5	Public
Bogotá D.C	BOGOTA	DIRECCION DE SANIDAD POLICIA NACIONAL	Cra. 59 No. 26 21 CAN	4.64735	-74.0974	Pediatric	5	Public
Bogotá D.C	BOGOTA	DIRECCION DE SANIDAD POLICIA NACIONAL	Cra. 59 No. 26 21 CAN	4.64735	-74.0974	Adult	12	Public
Bogotá D.C	BOGOTA	inversiones sequoia colombia S.A.S	Calle 97#23-10	4.685	-74.0565	Adult	1	Private
Bogotá D.C	BOGOTA	PSQ SAS	CARRERA 28 # 74 - 10 / 24	4.66658	-74.0688	Adult	8	Private
Bogotá D.C	BOGOTA	ADMINISTRADORA CLINICA LA COLINA SAS	CALLE 167 No 72-07	4.75012	-74.0655	Adult	7	Private
Bogotá D.C	BOGOTA	CLINICA LOS NOGALES SAS	Calle 95 N° 23-61	4.68304	-74.0572	Adult	36	Private
Bogotá D.C	BOGOTA	CLINICA SAN FRANCISCO DE ASIS SAS	CALLE 16 16-80	4.60807	-74.0805	Adult	12	Private
Bogotá D.C	BOGOTA	CLINICA CENTENARIO S.A.S	CALLE 13 17 21	4.60596	-74.0829	Adult	30	Private
Bogotá D.C	BOGOTA	CORPORACION SALUD UN	CL 44 # 59 75	4.64881	-74.0955	Adult	46	Private
Bogotá D.C	BOGOTA	SUBRED INTEGRADA DE SERVICIOS DE SALUD CENTRO ORIENTE E.S.E	CARRERA 14 B NUMERO 1-45 SUR	4.59151	-74.0923	Pediatric	8	Public
Bogotá D.C	BOGOTA	SUBRED INTEGRADA DE SERVICIOS DE SALUD CENTRO ORIENTE E.S.E	CARRERA 14 B NUMERO 1-45 SUR	4.59151	-74.0923	Adult	32	Public
Bogotá D.C	BOGOTA	SUBRED INTEGRADA DE SERVICIOS DE SALUD CENTRO ORIENTE E.S.E	DIAGONAL 39 SUR NUMERO 3-20 ESTE	4.55268	-74.0946	Adult	8	Public
Bogotá D.C	BOGOTA	SUBRED INTEGRADA DE SERVICIOS DE SALUD NORTE E.S.E	CALLE 165 # 7 06	4.74266	-74.023	Neonatal	9	Public
Bogotá D.C	BOGOTA	SUBRED INTEGRADA DE SERVICIOS DE SALUD NORTE E.S.E	CALLE 165 # 7 06	4.74266	-74.023	Pediatric	9	Public
Bogotá D.C	BOGOTA	SUBRED INTEGRADA DE SERVICIOS DE SALUD NORTE E.S.E	CALLE 165 # 7 06	4.74266	-74.023	Adult	32	Public
Bogotá D.C	BOGOTA	SUBRED INTEGRADA DE SERVICIOS DE SALUD NORTE E.S.E	CALLE 165 # 7 06	4.74266	-74.023	Adult (Burning)	18	Public
Bogotá D.C	BOGOTA	SUBRED INTEGRADA DE SERVICIOS DE SALUD NORTE E.S.E	CALLE 165 # 7 06	4.74266	-74.023	Pediatric (Burning)	13	Public
Bogotá D.C	BOGOTA	SUBRED INTEGRADA DE SERVICIOS DE SALUD NORTE E.S.E	TRANSVERSAL 100 A # 80 A - 50	4.71106	-74.1097	Neonatal	4	Public
Bogotá D.C	BOGOTA	SUBRED INTEGRADA DE SERVICIOS DE SALUD NORTE E.S.E	TRANSVERSAL 100 A # 80 A - 50	4.71106	-74.1097	Adult	7	Public
Bogotá D.C	BOGOTA	SUBRED INTEGRADA DE SERVICIOS DE SALUD NORTE E.S.E	KR 104 Nº 152C-50	4.75358	-74.0917	Neonatal	6	Public
Bogotá D.C	BOGOTA	SUBRED INTEGRADA DE SERVICIOS DE SALUD NORTE E.S.E	KR 104 Nº 152C-50	4.75358	-74.0917	Adult	6	Public
Bogotá D.C	BOGOTA	SUBRED INTEGRADA DE SERVICIOS DE SALUD SUR E.S.E.	CR 20 47B-35 SUR	4.57152	-74.1283	Adult	35	Public
Bogotá D.C	BOGOTA	SUBRED INTEGRADA DE SERVICIOS DE SALUD SUR E.S.E.	KR 18 B No. 60 G - 36 SUR	4.55953	-74.1383	Pediatric	8	Public
Bogotá D.C	BOGOTA	SUBRED INTEGRADA DE SERVICIOS DE SALUD SUR E.S.E.	KR 18 B No. 60 G - 36 SUR	4.55953	-74.1383	Adult	20	Public
Bogotá D.C	BOGOTA	Subred Integrada de Servicios de Salud Sur Occidente E.S.E	TV 74 F # 40 B 54 SUR	4.61658	-74.1533	Pediatric	4	Public
Bogotá D.C	BOGOTA	Subred Integrada de Servicios de Salud Sur Occidente E.S.E	TV 74 F # 40 B 54 SUR	4.61658	-74.1533	Adult	24	Public
Bogotá D.C	BOGOTA	CENTRO CARDIOVASCULAR COLOMBIANO SAS - SIGLA CC CARDIOVASCULAR	CARRERA 71 B Nº 51 - 09	4.6687	-74.1077	Adult	20	Private
Bogotá D.C	BOGOTA	LOSCOBOS MEDICAL CENTER SAS - LOSCOBOS	AK 9 N° 131 A - 40	4.71065	-74.0323	Adult	23	Private
Bogotá D.C	BOGOTA	CLINICA NUEVA EL LAGO S.A.S.	Calle 76 No. 15-55 Sótano 1 (S1-1 S1-2 S1-6 S1-7 S1-8 S1-9 S1-10 S1-11) Pisos 1-2-3-4-5-6-7-8-9	4.66292	-74.0597	Adult	17	Private
Bogotá D.C	BOGOTA	Clínica Santa Mónica de Bogotá SAS	KR 49 D # 91 33	4.67999	-74.0642	Adult	10	Private
Bogotá D.C	BOGOTA	ZENSA MEDICA SAS	CR 45A # 94-71	4.68306	-74.0589	Adult	13	Private
Bogotá D.C	BOGOTA	FUNDACION CTIC - CENTRO DE TRATAMIENTO E INVESTIGACION SOBRE CANCER LUIS CARLOS SARMIENTO ANGULO	Calle 168 14 42	4.74805	-74.0363	Pediatric	1	Private
Bogotá D.C	BOGOTA	FUNDACION CTIC - CENTRO DE TRATAMIENTO E INVESTIGACION SOBRE CANCER LUIS CARLOS SARMIENTO ANGULO	Calle 168 14 42	4.74805	-74.0363	Adult	28	Private
Bolívar	EL CARMEN DE BOLIVAR	ESE HOSPITAL NUESTRA SEÑORA DEL CARMEN	CALLE 23 # 56 - 32	9.71371	-75.1171	Adult	6	Public
Bolívar	MAGANGUE	EMPRESA SOCIAL DEL ESTADO HOSPITAL LA DIVINA MISERICORDIA	Avenida Colombia Nº13-146	9.24425	-74.7553	Adult	20	Public
Bolívar	MAGANGUE	EMPRESA SOCIAL DEL ESTADO HOSPITAL LA DIVINA MISERICORDIA	Carrera 14 #16-42	9.24425	-74.7553	Adult	13	Public
Bolívar	MAGANGUE	INTEGRALES HEALTH S.A.S	CARRERA 13 #16-45	9.24559	-74.7541	Adult	6	Private
Boyacá	CHIQUINQUIRA	EMPRESA SOCIAL DEL ESTADO HOSPITAL REGIONAL DE CHIQUINQUIRA	KRA 13 # 18 - 60	5.61994	-73.8171	Adult	7	Public
Boyacá	DUITAMA	EMPRESA SOCIAL DEL ESTADO HOSPITAL REGIONAL DE DUITAMA	AV AMERICAS KR 35	5.81189	-73.0313	Adult	9	Public
Boyacá	DUITAMA	MEINTEGRAL SAS	Transversal 29 # 9c - 41 segundo piso clinica Boyaca	5.81486	-73.0308	Adult	5	Private
Boyacá	SOGAMOSO	CLINICA DE ESPECIALISTAS LTDA.	KR 9A # 14-17	5.71653	-72.9256	Adult	5	Private
Boyacá	SOGAMOSO	CLINICA EL LAGUITO S.A	CL 22 No. 11A 73	5.72471	-72.9241	Adult	7	Private
Boyacá	TUNJA	EMPRESA SOCIAL DEL ESTADO HOSPITAL UNIVERSITARIO SAN RAFAEL DE TUNJA	CRA 11 N°27-27	5.5405	-73.3613	Pediatric	10	Public
Boyacá	TUNJA	EMPRESA SOCIAL DEL ESTADO HOSPITAL UNIVERSITARIO SAN RAFAEL DE TUNJA	CRA 11 N°27-27	5.5405	-73.3613	Adult	35	Public
Boyacá	TUNJA	CENTRO DE CANCEROLOGIA DE BOYACA SAS.	AVDA UNIVERSITARIA No 46-71	5.5516	-73.346	Adult	5	Private
Boyacá	TUNJA	CLINICA MEDILASER S.A.S.	Carrera 2 Este N° 67B-90	5.56966	-73.3368	Adult	21	Private
Boyacá	TUNJA	Inversiones Medicas de los Andes S.A.S.	TRANSVERSAL 11 Nº 30 - 61	5.54398	-73.3596	Adult	8	Private
Boyacá	TUNJA	GARCIA PEREZ MEDICA Y COMPAÑIA SAS	Carrera 6ta No.44-47	5.55344	-73.352	Adult	8	Private
Buenaventura	BUENAVENTURA	HOSPITAL LUIS ABLANQUE DE LA PLATA EMPRESA SOCIAL DEL ESTADO	Calle 5 No. 17-19	3.88239	-77.065	Adult	12	Public
Buenaventura	BUENAVENTURA	CLINICA SANTA SOFIA DEL PACIFICO LTDA	CRA 47 # 04-02	3.88058	-77.0202	Pediatric	2	Private
Buenaventura	BUENAVENTURA	CLINICA SANTA SOFIA DEL PACIFICO LTDA	CRA 47 # 04-02	3.88058	-77.0202	Adult	10	Private
Caldas	LA DORADA	MEDICINA INTENSIVA DEL TOLIMA S. A	CALLE 12 Nº 4-20	5.4516	-74.6636	Adult	10	Private
Caldas	MANIZALES	CRUZ ROJA COLOMBIANA SECCIONAL CALDAS	Carrera 23 Nº 49 - 30	5.06412	-75.4986	Pediatric	8	Private
Caldas	MANIZALES	SERVICIOS ESPECIALES DE SALUD-SES HOSPITAL UNIVERSITARIO DE CALDAS	Calle 48 No 25-71	5.063	-75.5009	Adult	20	Mixta
Caldas	MANIZALES	CLINICA OSPEDALE MANIZALES S.A	CALLE 51 N° 24-50	5.06293	-75.4978	Adult	16	Private
Caldas	MANIZALES	CAJA DE COMPENSACION FAMILIAR DE CALDAS	CARRERA 30 Nº 93 - 25	5.06343	-75.5116	Adult	10	Private
Caldas	MANIZALES	ESE HOSPITAL DEPARTAMENTAL UNIVERSITARIO SANTA SOFIA DE CALDAS	CALLE 5° N° 40-02 BARRIO ASTURIAS	5.05761	-75.5299	Adult	27	Public
Caldas	MANIZALES	HERMANAS DE LA CARIDAD DOMINICAS DE LA PRESENTACION DE LA SANTISIMA VIRGEN	CARRERA 23 CALLE 46 ESQUINA	5.06594	-75.5017	Adult	11	Private
Caldas	MANIZALES	ONCOLOGOS DEL OCCIDENTE S.A.S.	CALLE 92 No 29-75	5.03598	-75.4693	Adult	10	Private
Caldas	MANIZALES	AVIDANTI SAS	CALLE 10 N° 2C-10 AVENIDA RESTREPO	5.08372	-75.526	Adult	37	Private
Caldas	MANIZALES	MEINTEGRAL S.A.S	AV. ALBERTO MENDOZA CRA. 30 N. 93 -25	5.06341	-75.5116	Pediatric	8	Private
Caldas	MANIZALES	ZENSA MEDICA SAS	CARRERA 24 No 56-50 PISO 4	5.06042	-75.4918	Adult	6	Private
Caldas	RIOSUCIO	HOSPITAL DEPARTAMENTAL SAN JUAN DE DIOS DE RIOSUCIO CALDAS ESE	Carrera 5 # 18-17 Avenida Fundadores Frente al Coliseo Municipal	5.42872	-75.703	Adult	10	Public
Cali	CALI	DIME CLINICA NEUROCARDIOVASCULAR S.A	AV 5 NORTE # 20N-75	3.46173	-76.529	Adult	12	Private
Cali	CALI	CLINICA IMBANACO S.A.S.	CRA. 38 BIS No. 5 B2 - 04	3.42646	-76.5453	Pediatric	9	Private
Cali	CALI	CLINICA IMBANACO S.A.S.	CRA. 38 BIS No. 5 B2 - 04	3.42646	-76.5453	Adult	25	Private
Cali	CALI	CLINICA IMBANACO S.A.S.	CRA. 38 BIS No. 5 B2 - 04	3.42646	-76.5453	Adult (Burning)	1	Private
Cali	CALI	CLINICA IMBANACO S.A.S.	CRA. 38 BIS No. 5 B2 - 04	3.42646	-76.5453	Pediatric (Burning)	1	Private
Cali	CALI	CLINICA NUESTRA SEÑORA DE LOS REMEDIOS	AV 2N # 24-157	3.46328	-76.5223	Adult	38	Private
Cali	CALI	FUNDACION CLINICA INFANTIL CLUB NOEL	CALLE 5 # 22-76	3.43988	-76.538	Pediatric	12	Private
Cali	CALI	SOCIEDAD N.S.D.R. S.A.S	CL 10 # 33-51	3.42523	-76.5335	Adult	22	Private
Cali	CALI	FUNDACION VALLE DEL LILI	KR 98 # 18-49	3.37293	-76.5256	Pediatric	29	Private
Cali	CALI	FUNDACION VALLE DEL LILI	KR 98 # 18-49	3.37293	-76.5256	Adult	85	Private
Cali	CALI	FUNDACION VALLE DEL LILI	CARRERA 70 # 18-75 ESQUINA	3.39338	-76.5256	Adult	22	Private
Cali	CALI	CLINICA DE OCCIDENTE	CALLE 18 NORTE # 5N-34	3.46035	-76.5304	Pediatric	2	Private
Cali	CALI	CLINICA DE OCCIDENTE	CALLE 18 NORTE # 5N-34	3.46035	-76.5304	Adult	51	Private
Cali	CALI	CLINICA VERSALLES S.A.	AV 5AN # 23-57	3.46429	-76.5281	Adult	25	Private
Cali	CALI	Hospital Universitario del Valle "Evaristo Garcia" E.S.E.	CALLE 5 # 36 - 08	3.43046	-76.5449	Pediatric	6	Public
Cali	CALI	Hospital Universitario del Valle "Evaristo Garcia" E.S.E.	CALLE 5 # 36 - 08	3.43046	-76.5449	Adult	82	Public
Cali	CALI	Hospital Universitario del Valle "Evaristo Garcia" E.S.E.	CALLE 5 # 36 - 08	3.43046	-76.5449	Adult (Burning)	2	Public
Cali	CALI	Hospital Universitario del Valle "Evaristo Garcia" E.S.E.	CALLE 5 # 36 - 08	3.43046	-76.5449	Pediatric (Burning)	2	Public
Cali	CALI	COSMITET LTDA ,CORPORACION DE SERVICIOS MEDICOS INTERNACIONALES THEM Y COMPAÑIA LTDA	KR 34 # 7-00	3.42686	-76.5383	Neonatal	6	Private
Cali	CALI	COSMITET LTDA ,CORPORACION DE SERVICIOS MEDICOS INTERNACIONALES THEM Y COMPAÑIA LTDA	KR 34 # 7-00	3.42686	-76.5383	Pediatric	2	Private
Cali	CALI	COSMITET LTDA ,CORPORACION DE SERVICIOS MEDICOS INTERNACIONALES THEM Y COMPAÑIA LTDA	KR 34 # 7-00	3.42686	-76.5383	Adult	35	Private
Cali	CALI	CLINICA COLSANITAS S.A.	AV 4 NORTE # 7N-81	3.45472	-76.5371	Adult	6	Private
Cali	CALI	CENTRO DE MEDICINA FISICA Y REHABILITACION RECUPERAR	CL 5A # 40-21	3.42302	-76.5462	Adult	9	Private
Cali	CALI	HOSPITAL ISAIAS DUARTE CANCINO EMPRESA SOCIAL DEL ESTADO	CL 96 # 28 -E3 - 01	3.41145	-76.4856	Adult	22	Public
Cali	CALI	CLINICA FARALLONES S A	Calle 9c # 50-25	3.41017	-76.5395	Adult	26	Private
Cali	CALI	DUMIAN MEDICAL S.A.S	CRA 78 NO. 2A - 00 OESTE	3.38715	-76.558	Adult	14	Private
Cali	CALI	FABILU S.A.S	CRA 46 # 9C-85	3.41461	-76.5385	Adult	38	Private
Cali	CALI	CLINICA DESA CALI	CALLE 5D NRO. 38 A 35	3.42297	-76.5419	Adult	40	Private
Cali	CALI	PROVIDA FARMACEUTICA SAS	CARRERA 44 NO 9C 58	3.41573	-76.538	Adult	12	Private
Cali	CALI	CLINICA VALLE SALUD SAN FERNANDO S.A.S	CL. 5 NRO 38 48 PISOS 1,3, 5 Y 6 DE CALI	3.42798	-76.5459	Adult	5	Private
Cali	CALI	FABISALUD IPS SAS	AVENIDA 4 NORTE # 22 N -46	3.46273	-76.5273	Adult	45	Private
Cali	CALI	CLINICA NUEVA DE CALI SAS	CALLE 6 # 8-16	3.44773	-76.5361	Adult	18	Private
Cali	CALI	MEDICOS ESPECIALISTAS UNIDOS SAS - Medisun SAS	CARRERA 4 No. 17-67 SEGUNDO PISO HOSPITAL SAN JUAN DE DIOS	3.45512	-76.5278	Adult	20	Private
Cali	CALI	ATS Y CIA S.A.S	AVENIDA 4 NORTE # 21N54	3.46148	-76.5283	Adult	10	Private
Caquetá	FLORENCIA	HOSPITAL DEPARTAMENTAL MARIA INMACULADA ESE	DG 20No 7-93	1.62	-75.6113	Adult	18	Public
Caquetá	FLORENCIA	CLINICA MEDILASER S.A.S.	CALLE 6 No. 14A-55 BARRIO JUAN XXIII	1.60783	-75.6078	Adult	20	Private
Cartagena	CARTAGENA	CLINICA CARTAGENA DEL MAR S.A.S	PIE DE LA POPA CL 30 # 20-71	10.4205	-75.533	Adult	10	Private
Cartagena	CARTAGENA	MEDIHELP SERVICES COLOMBIA	KR 6a Nº 5-101	10.3975	-75.5563	Adult	12	Private
Cartagena	CARTAGENA	UCI DEL CARIBE SAS	Cra: 3 No 8-177	10.4041	-75.5535	Adult	4	Private
Cartagena	CARTAGENA	CENTROMEDICO CRECER LTDA	PRADO, AV. PEDRO DE HEREDIA No. 34-22	10.4092	-75.5173	Adult	5	Private
Cartagena	CARTAGENA	Congregación de Hermanas Franciscanas Misioneras de María Auxiliadora, Región Misionera Santa María Bernarda.	KR 71 Nº 31-395	10.3944	-75.4769	Adult	14	Private
Cartagena	CARTAGENA	CLINICA BLAS DE LEZO S.A.	TV 54 No. 47-57 CT. BOSQUE	10.3919	-75.4868	Pediatric	2	Private
Cartagena	CARTAGENA	CLINICA BLAS DE LEZO S.A.	TV 54 No. 47-57 CT. BOSQUE	10.3919	-75.4868	Adult	15	Private
Cartagena	CARTAGENA	CLINICA CARDIOVASCULAR JESUS DE NAZARETH TRANSFORMACION EN SAS	DIAGONAL 32 No 71A - 213	10.3936	-75.4756	Adult	14	Private
Cartagena	CARTAGENA	GESTION SALUD S.A.S.	Cra. 29 No 38-20	10.4074	-75.5163	Adult	10	Private
Cartagena	CARTAGENA	GESTION SALUD S.A.S.	UNIDAD HOSPITALARIA SAN FERNANDO CARRERA 81 CALLE 15	10.3793	-75.4761	Adult	18	Private
Cartagena	CARTAGENA	EMPRESA SOCIAL DEL ESTADO HOSPITAL UNIVERSITARIO DEL CARIBE	CALLE 29 No 50-50	10.4005	-75.5035	Adult	76	Public
Cartagena	CARTAGENA	ESTRIOS SAS	Diagonal 30 # 30b-41	10.4051	-75.5055	Pediatric	8	Private
Cartagena	CARTAGENA	ESTRIOS SAS	Diagonal 30 # 30b-41	10.4051	-75.5055	Adult	10	Private
Cartagena	CARTAGENA	FUNDACION UNIDAD DE CUIDADOS INTENSIVOS DOÑA PILAR	BRUSELAS TRV 36 # 36-33	10.4072	-75.5188	Pediatric	24	Private
Cartagena	CARTAGENA	CLINICA GENERAL DEL CARIBE S.A.	CASTELLANA TV 71B No. 31-64 SECTOR CONTADORA	10.3971	-75.4871	Adult	15	Private
Cartagena	CARTAGENA	CLINICA HIGEA IPS S.A.	CRA 41 # 27- 92 PRIMER CALLEJON , ESQUINA	10.4066	-75.5148	Pediatric	1	Private
Cartagena	CARTAGENA	CLINICA HIGEA IPS S.A.	CRA 41 # 27- 92 PRIMER CALLEJON , ESQUINA	10.4066	-75.5148	Adult	3	Private
Cartagena	CARTAGENA	FUNDACION CENTRO COLOMBIANO DE EPILEPSIA Y ENFERMEDADES NEUROLOGICAS	CLL 1a EL EDEN DG 32 No. 82-40	10.3887	-75.4689	Pediatric	4	Private
Cartagena	CARTAGENA	FUNDACION CENTRO COLOMBIANO DE EPILEPSIA Y ENFERMEDADES NEUROLOGICAS	CLL 1a EL EDEN DG 32 No. 82-40	10.3887	-75.4689	Adult	2	Private
Cartagena	CARTAGENA	PROMOTORA BOCAGRANDE S.A "PROBOCA S.A"	CASTILLOGRANDE CRA 5 Y 6	10.3958	-75.5558	Adult	18	Private
Cartagena	CARTAGENA	SOCIEDAD SAN JOSE DE TORICES S.A	CRA 14 No. 43-66	10.4319	-75.5347	Adult	11	Private
Cartagena	CARTAGENA	SOCIEDAD N.S.D.R. S.A.S	PROVIDENCIA CRA 71 No. 31-85	10.3919	-75.479	Adult	10	Private
Cartagena	CARTAGENA	CLINICA BARU	URBANIZACION LOS ANGELES, CALLE 31 No 60A-14	10.3958	-75.4917	Adult	1	Private
Cartagena	CARTAGENA	CLINICA BARU	URBANIZACION LOS ANGELES, CALLE 31 No 60A-14	10.3958	-75.4917	Adult	3	Private
Cartagena	CARTAGENA	CLINICA LA ERMITA DE CARTAGENA S.A.S.	CARRERA 20A # 29B - 112	10.418	-75.5331	Adult	15	Private
Cartagena	CARTAGENA	DUMIAN MEDICAL S.A.S	Transversal 54 No. 30 - 111 Carretera el Bosque	10.3917	-75.4865	Pediatric	5	Private
Cartagena	CARTAGENA	DUMIAN MEDICAL S.A.S	Transversal 54 No. 30 - 111 Carretera el Bosque	10.3917	-75.4865	Adult	23	Private
Cartagena	CARTAGENA	UCI SAN RAFAEL ARCANGEL S.A.S.	cra 21-30-29 segundo piso 201-202	10.4197	-75.5312	Neonatal	5	Private
Cartagena	CARTAGENA	Clinica de la Mujer Cartagena S.A.S	CALLE 30 AV. PEDRO DE HEREDIA No. 35-119	10.41	-75.5173	Adult	9	Private
Cartagena	CARTAGENA	nuestra señora de la candelaria s.a.s	pie de la popa calle de la candelaria cra 21 #30-29	10.4197	-75.5311	Adult	4	Private
Cartagena	CARTAGENA	CENTRO HOSPITALARIO SERENA DEL MAR S.A.	Vía al Mar KM 8	10.5069	-75.4666	Neonatal	3	Private
Cartagena	CARTAGENA	CENTRO HOSPITALARIO SERENA DEL MAR S.A.	Vía al Mar KM 8	10.5069	-75.4666	Pediatric	4	Private
Cartagena	CARTAGENA	CENTRO HOSPITALARIO SERENA DEL MAR S.A.	Vía al Mar KM 8	10.5069	-75.4666	Adult	7	Private
Casanare	YOPAL	CLINICA CASANARE S.A	CALLE 13 # 29 - 36	5.34844	-72.3911	Adult	12	Private
Casanare	YOPAL	SERVICIO INTEGRAL DE MEDICINA AMBULATORIA - SIMA.LINK S.A.S	CALLE 13 # 29 - 41 Piso 4.	5.34876	-72.3915	Adult	10	Private
Casanare	YOPAL	GYO MEDICAL I.P.S. S.A.S.	Calle 15 N° 7 - 95 - 2° piso	5.34172	-72.4082	Pediatric	2	Private
Casanare	YOPAL	GYO MEDICAL I.P.S. S.A.S.	Calle 15 N° 7 - 95 - 2° piso	5.34172	-72.4082	Adult	14	Private
Casanare	YOPAL	CLINICA MEDICENTER FICUBO SAS	CRA 23 N. 12-43	5.34658	-72.3957	Adult	7	Private
Cauca	POPAYAN	HOSPITAL SUSANA LOPEZ DE VALENCIA, EMPRESA SOCIAL DEL ESTADO	CLLE 15 # 17A-196 BARRIO LA LADERA	2.43735	-76.6192	Pediatric	6	Public
Cauca	POPAYAN	HOSPITAL SUSANA LOPEZ DE VALENCIA, EMPRESA SOCIAL DEL ESTADO	CLLE 15 # 17A-196 BARRIO LA LADERA	2.43735	-76.6192	Adult	17	Public
Cauca	POPAYAN	HOSPITAL UNIVERSITARIO SAN JOSE DE POPAYAN E.S.E.	KR 6 # 10 N-142	2.45019	-76.6	Pediatric	11	Public
Cauca	POPAYAN	HOSPITAL UNIVERSITARIO SAN JOSE DE POPAYAN E.S.E.	KR 6 # 10 N-142	2.45019	-76.6	Adult	41	Public
Cauca	POPAYAN	CLINICA LA ESTANCIA S. A.	CL 15 N # 2-350	2.45058	-76.5972	Adult	30	Private
Cauca	POPAYAN	DUMIAN MEDICAL S.A.S	CALLE 15N N°15-49	2.4593	-76.6028	Adult	22	Private
Cesar	AGUACHICA	ESE HOSPITAL REGIONAL DE AGUACHICA JOSE DAVID PADILLA VILLAFAÑE	CL 5 NUMERO 30A-56	8.30916	-73.6047	Adult	10	Public
Cesar	AGUACHICA	CLINICA ALTA COMPLEJIDAD DE AGUACHICA S.A.S.	Calle 5 No. 26-42	8.30928	-73.6085	Pediatric	3	Private
Cesar	AGUACHICA	CLINICA ALTA COMPLEJIDAD DE AGUACHICA S.A.S.	Calle 5 No. 26-42	8.30928	-73.6085	Adult	13	Private
Cesar	BOSCONIA	clinica regional de especialistas sinais vitais sas	CALLE 18 NRO. 16 - 09	9.97472	-73.884	Adult	12	Private
Cesar	BOSCONIA	clinica regional de especialistas sinais vitais sas	CALLE 18 NRO. 16 - 09	9.97472	-73.884	Pediatric	2	Private
Cesar	CHIRIGUANA	Hospital Regional San Andres ESE	CALLE 7 CON CARRERA 7 ESQUINA CALLE BOLIVAR	9.36265	-73.5993	Adult	10	Public
Cesar	VALLEDUPAR	CLINICA INTEGRAL DE EMERGENCIAS LAURA DANIELA S.A.	CARRERA 19 NUMERO 14-47	10.4706	-73.2572	Pediatric	12	Private
Cesar	VALLEDUPAR	CLINICA INTEGRAL DE EMERGENCIAS LAURA DANIELA S.A.	CARRERA 19 NUMERO 14-47	10.4706	-73.2572	Adult	10	Private
Cesar	VALLEDUPAR	CLINICA INTEGRAL DE EMERGENCIAS LAURA DANIELA S.A.	Carrera 18D N° 22-33	10.4621	-73.2511	Adult	11	Private
Cesar	VALLEDUPAR	Clinica Buenos Aires S.A:S	carrera 15 # 14-36	10.4733	-73.2534	Adult	10	Private
Cesar	VALLEDUPAR	Clinica Buenos Aires S.A:S	carrera 15 # 14-36	10.4733	-73.2534	Adult (Burning)	10	Private
Cesar	VALLEDUPAR	CLINICA ERASMO LTDA	CRA 19 No 4C-72	10.4878	-73.2643	Adult	7	Private
Cesar	VALLEDUPAR	CLINICA DEL CESAR S.A.	CALLE 16 No 14-90	10.4721	-73.2521	Adult	18	Private
Cesar	VALLEDUPAR	HOSPITAL ROSARIO PUMAREJO DE LOPEZ - EMPRESA SOCIAL DEL ESTADO	CALLE 16 C Nº 17-141	10.4691	-73.2547	Pediatric	7	Public
Cesar	VALLEDUPAR	HOSPITAL ROSARIO PUMAREJO DE LOPEZ - EMPRESA SOCIAL DEL ESTADO	CALLE 16 C Nº 17-141	10.4691	-73.2547	Adult	13	Public
Cesar	VALLEDUPAR	CLINICA VALLEDUPAR S.A	CALLE 16No 15-15	10.4715	-73.2522	Adult	13	Private
Cesar	VALLEDUPAR	CLINICA MEDICOS S.A.	CALLE 16B No.11-33	10.4724	-73.2474	Pediatric	6	Private
Cesar	VALLEDUPAR	CLINICA MEDICOS S.A.	CALLE 16B No.11-33	10.4724	-73.2474	Adult	28	Private
Cesar	VALLEDUPAR	CLINICA MEDICOS S.A.	Calle 14 N° 17 -47	10.4721	-73.2554	Pediatric	10	Private
Cesar	VALLEDUPAR	CLINICA MEDICOS S.A.	Calle 14 N° 17 -47	10.4721	-73.2554	Adult	61	Private
Cesar	VALLEDUPAR	CLINICA MEDICOS S.A.	Calle 14 N° 17 -47	10.4721	-73.2554	Adult (Burning)	1	Private
Cesar	VALLEDUPAR	INSTITUTO CARDIOVASCULAR DEL CESAR S.A	CARRERA 16 N°16A-42	10.4701	-73.2523	Adult	14	Private
Cesar	VALLEDUPAR	Unidad Pediátrica Simón Bolívar IPS SAS	CR 18D N° 28-41	10.4564	-73.2481	Pediatric	6	Private
Cesar	VALLEDUPAR	Unidad Pediátrica Simón Bolívar IPS SAS	CR 18D N° 28-41	10.4564	-73.2481	Adult	20	Private
Cesar	VALLEDUPAR	CENTRO DE ESPECIALIDADES MEDICAS DEL CESAR S.A.S	CALLE 13 B BIS 15-60 ALFONSO LOPEZ	10.4746	-73.2551	Adult	6	Private
Cesar	VALLEDUPAR	NUEVA CLINICA DE SANTO TOMAS S.A.S.	Carrera 10 N° 13C - 47	10.4769	-73.2494	Pediatric	3	Private
Cesar	VALLEDUPAR	NUEVA CLINICA DE SANTO TOMAS S.A.S.	Carrera 10 N° 13C - 47	10.4769	-73.2494	Adult	5	Private
Cesar	VALLEDUPAR	ING CLINICAL CENTER SAS	CALLE 16 # 17 - 261	10.4703	-73.2542	Adult	11	Private
Cesar	VALLEDUPAR	CLINICA SANTA MARIA DEL CARIBE S.A.S	TRANSVERSAL 18B 20 -07	10.4665	-73.2544	Adult	8	Private
Cesar	VALLEDUPAR	CLINICA SANTA MARIA DEL CARIBE S.A.S	TRANSVERSAL 18B 20 -07	10.4665	-73.2544	Pediatric	2	Private
Chocó	QUIBDO	Unidad de Cuidados Intensivos y Coronarios SAS	Carrera 4 # 29-57	5.69356	-76.6592	Adult	4	Private
Chocó	QUIBDO	Unidad de Cuidados Críticos del Chocó SAS	Carrera 4 No. 29-64	5.69368	-76.6591	Adult	6	Private
Chocó	QUIBDO	UNIDAD MEDICOQUIRURGICA SANTIAGO I.P.S.	CARRERA 23 # 21-21	5.68402	-76.6421	Adult	12	Private
Córdoba	CERETE	EMPRESA SOCIAL DEL ESTADO HOSPITAL SANDIEGO DE CERETE	CRA 20 CALLE 23	8.8788	-75.7959	Adult	13	Public
Córdoba	LORICA	CLINICA LA TRINIDAD I.P.S. LTDA	CL 2a #15-72	9.22738	-75.8201	Adult	10	Private
Córdoba	LORICA	E.S.E. HOSPITAL SAN VICENTE DE PAUL DE LORICA	kr26#17-124	9.23837	-75.8122	Adult	24	Public
Córdoba	LORICA	UNIDAD DE CUIDADOS INTENSIVOS NEONATAL DEL BAJO SINU	KR 26 #17-124 HOSPITAL SAN VICENTE DE PAUL DE LORICA	9.23837	-75.8122	Pediatric (Burning)	2	Private
Córdoba	MONTERIA	FUNDACION AMIGOS DE LA SALUD	CARRERA 11 # 27 34	8.75111	-75.8816	Pediatric	6	Private
Córdoba	MONTERIA	FUNDACION AMIGOS DE LA SALUD	CARRERA 11 # 27 34	8.75111	-75.8816	Adult	64	Private
Córdoba	MONTERIA	FUNDACION AMIGOS DE LA SALUD	CARRERA 11 # 27 34	8.75111	-75.8816	Adult (Burning)	10	Private
Córdoba	MONTERIA	FUNDACION AMIGOS DE LA SALUD	CARRERA 11 # 27 34	8.75111	-75.8816	Pediatric (Burning)	2	Private
Córdoba	MONTERIA	CLINICA ZAYMA S.A.S	Cl 28 Nº 7-11	8.75409	-75.8838	Adult	11	Private
Córdoba	MONTERIA	ESE HOSPITAL SAN JERONIMO DE MONTERIA	Calle 22 y 24 Cra 14 No. 22-50	8.74679	-75.8809	Adult	23	Public
Córdoba	MONTERIA	CLINICA MATERNO INFANTIL CASA DEL NIÑO S.A.S	CALLE 39 N° 6 - 15	8.76096	-75.8784	Pediatric	7	Private
Córdoba	MONTERIA	CLINICA MATERNO INFANTIL CASA DEL NIÑO S.A.S	CALLE 39 N° 6 - 15	8.76096	-75.8784	Adult	18	Private
Córdoba	MONTERIA	CLINICA MONTERIA S.A	Carrera 4ta N° 60-35	8.77155	-75.8678	Adult	13	Private
Córdoba	MONTERIA	SOCIEDAD CORDOBESA DE CIRUGIA VASCULAR S.AS	CRA 9 # 25-27	8.7516	-75.8839	Adult	16	Private
Córdoba	MONTERIA	ESPECIALISTAS ASOCIADOS S.A.	CALLE 27 Nº13-38	8.74955	-75.8803	Adult	19	Private
Córdoba	MONTERIA	ONCOMEDICA S.A.S	KRA 6 # 72-34	8.78183	-75.8605	Pediatric	5	Private
Córdoba	MONTERIA	ONCOMEDICA S.A.S	KRA 6 # 72-34	8.78183	-75.8605	Adult	19	Private
Córdoba	MONTERIA	CLINICA CENTRAL O.H.L. LTDA	KR6#30-36	8.7558	-75.8835	Adult	6	Private
Córdoba	MONTERIA	CLINICA LA ESPERANZA DE MONTERIA S.A.S.	CL 12 No. 4 - 58	8.74527	-75.8916	Pediatric	1	Private
Córdoba	MONTERIA	CLINICA LA ESPERANZA DE MONTERIA S.A.S.	CL 12 No. 4 - 58	8.74527	-75.8916	Adult	12	Private
Córdoba	MONTERIA	CLINICA CARDIO INTEGRAL IPS. SAS	CL 17A Nº 16-30	8.74527	-75.8916	Neonatal	10	Private
Córdoba	MONTERIA	CLINICA CARDIO INTEGRAL IPS. SAS	CL 17A Nº 16-30	8.74527	-75.8916	Pediatric	7	Private
Córdoba	MONTERIA	CLINICA CARDIO INTEGRAL IPS. SAS	CL 17A Nº 16-30	8.74527	-75.8916	Pediatric (Burning)	7	Private
Córdoba	MONTERIA	AMRITZAR S.A.	KR 14 No. 22 - 24	8.74866	-75.8796	Pediatric	5	Private
Córdoba	MONTERIA	FUNDACION CLINICA DEL RIO	Cra 3 No 12-08	8.74643	-75.8924	Adult	7	Private
Córdoba	MONTERIA	Clinica Universitaria Medicina Integral S.A. - CUMI	Calle 44 No. 14 - 282	8.75965	-75.8702	Adult	33	Private
Córdoba	MONTERIA	INSTITUTO DE SISTEMA NERVIOSO DE CORDOBA	CARRERA 8 # 35-09	8.75787	-75.8801	Pediatric	4	Private
Córdoba	MONTERIA	INSTITUTO DE SISTEMA NERVIOSO DE CORDOBA	CARRERA 8 # 35-09	8.75787	-75.8801	Adult	28	Private
Córdoba	MONTERIA	INSTITUTO MEDICO DE ALTA TECNOLOGIA S.A.S	CALLE 72 No 6A-87	8.78183	-75.8605	Pediatric	7	Private
Córdoba	MONTERIA	INSTITUTO MEDICO DE ALTA TECNOLOGIA S.A.S	CALLE 72 No 6A-87	8.78183	-75.8605	Adult	28	Private
Córdoba	SAHAGUN	SABANASALUD SAHAGUN S.A.S.	CALLE 18 # 1-60	8.9544	-75.4506	Adult	18	Private
Cundinamarca	CAJICA	CENTRO MEDICO SAN LUIS CLINICA QUIRURGICA S.A.S.	Calle 1 Nro. 3-73 y Cra. 4 Nro. 0-90	4.91547	-74.0255	Adult	5	Private
Cundinamarca	CAQUEZA	E.S.E. HOSPITAL SAN RAFAEL DE CAQUEZA	Calle 6 Nº 5 - 00	4.40602	-73.9491	Adult	6	Public
Cundinamarca	CHIA	CLINICA UNIVERSIDAD DE LA SABANA	Km. 21 Autopista Norte- La Caro	4.85636	-74.0304	Adult	12	Private
Cundinamarca	CHIA	CLINICA CHIA S.A	CALLE 6 No. 10 -125, CALLE 6 No 10 - 81	4.85653	-74.0625	Adult	6	Private
Cundinamarca	CHIA	CLINICA DE MARLY JORGE CAVELIER GAVIRIA SAS	AV PASEO DE LOS ZIPAS VDA BOJACA LT 20 Y 23	4.87483	-74.0366	Adult	4	Private
Cundinamarca	FACATATIVA	E.S.E HOSPITAL SAN RAFAEL DE FACATATIVA	CARRERA 2 No. 1 - 80	4.80635	-74.3499	Adult	27	Public
Cundinamarca	FACATATIVA	MEDIFACA IPS S.A.S	Carrera 7# 13-95	4.8196	-74.3576	Adult	16	Private
Cundinamarca	FUSAGASUGA	E.S.E. HOSPITAL SAN RAFAEL DE FUSAGASUGA	DG 23. # 12-64	4.33356	-74.3712	Adult	4	Public
Cundinamarca	FUSAGASUGA	SOCIEDAD MEDICO QUIRURGICA NUESTRA SEÑORA DE BELEN DE FUSAGASUGA S.A.S	TV 12 No. 17-01	4.33618	-74.3664	Adult	7	Private
Cundinamarca	GIRARDOT	CAJA COLOMBIANA DE SUBSIDIO FAMILIAR COLSUBSIDIO	Carrera 8# 19 -45	4.29648	-74.8035	Adult	14	Private
Cundinamarca	GIRARDOT	DUMIAN MEDICAL S.A.S	CRA 5 No. 20 C 30	4.29665	-74.7983	Pediatric	2	Private
Cundinamarca	GIRARDOT	DUMIAN MEDICAL S.A.S	CRA 5 No. 20 C 30	4.29665	-74.7983	Adult	14	Private
Cundinamarca	GIRARDOT	DUMIAN MEDICAL S.A.S	CRA 5 No. 20 C 30	4.29665	-74.7983	Adult (Burning)	1	Private
Cundinamarca	GIRARDOT	DUMIAN MEDICAL S.A.S	CRA 5 No. 20 C 30	4.29665	-74.7983	Pediatric (Burning)	4	Private
Cundinamarca	GIRARDOT	JUNICAL MEDICAL S.A.S.	CRA 6A N 20-115 Y CRA 5 N 20A-37 /05/39/45/47	4.29611	-74.8005	Pediatric	1	Private
Cundinamarca	GIRARDOT	JUNICAL MEDICAL S.A.S.	CRA 6A N 20-115 Y CRA 5 N 20A-37 /05/39/45/47	4.29611	-74.8005	Adult	24	Private
Cundinamarca	PACHO	E.S.E. HOSPITAL SAN RAFAEL DE PACHO	CL 9 No. 16-35	5.13087	-74.1603	Adult	11	Public
Cundinamarca	SOACHA	INVERSIONES LUCEDMARB S.A	KR 4 Nº 20-28	4.58195	-74.2129	Adult	10	Private
Cundinamarca	SOACHA	HOSPITAL CARDIOVASCULAR DE CUNDINAMARCA S.A	Cr 4 Este N° 31-88	4.5825	-74.2005	Pediatric	10	Private
Cundinamarca	SOACHA	HOSPITAL CARDIOVASCULAR DE CUNDINAMARCA S.A	Cr 4 Este N° 31-88	4.5825	-74.2005	Adult	51	Private
Cundinamarca	TOCANCIPA	CARE & HEALTH SAS	CARRERA 4 #12-34	4.57844	-74.2189	Adult	10	Private
Cundinamarca	ZIPAQUIRA	MEINTEGRAL S.A.S	Cra 16 No 5-28	5.02059	-73.9984	Adult	8	Private
Cundinamarca	ZIPAQUIRA	ESE HOSPITAL UNIVERSITARIO DE LA SAMARITANA	CALLE 1 SUR N° 11-90	5.0164	-74.0039	Adult	12	Public
Huila	GARZON	E.S.E. HOSPITAL DEPARTAMENTAL SAN VICENTE DE PAUL DE GARZON	CALLE 7 # 14-25 Y CALLE 7 # 14-69	2.19888	-75.6314	Adult	8	Public
Huila	LA PLATA	ESE HOSPITAL DEPARTAMENTAL SAN ANTONIO DE PADUA	CARRERA 2E N. 11-17	2.39332	-75.8859	Adult	9	Public
Huila	NEIVA	CLINICA MEDILASER S.A.S.	CRA 7 # 11-65	2.93071	-75.2878	Pediatric	9	Private
Huila	NEIVA	CLINICA MEDILASER S.A.S.	CRA 7 # 11-65	2.93071	-75.2878	Adult	33	Private
Huila	NEIVA	CLINICA MEDILASER S.A.S.	Avenida calle 26 # 3W-98	2.94117	-75.2995	Adult	8	Private
Huila	NEIVA	SOCIEDAD CLINICA EMCOSALUD S.A.	CALLE 5 # 6-73	2.92522	-75.2864	Neonatal	5	Private
Huila	NEIVA	SOCIEDAD CLINICA EMCOSALUD S.A.	CALLE 5 # 6-73	2.92522	-75.2864	Adult	9	Private
Huila	NEIVA	E.S.E. HOSPITAL UNIVERSITARIO HERNANDO MONCALEANO PERDOMO DE NEIVA	CALLE 9 # 15-25	2.93223	-75.2812	Pediatric	10	Public
Huila	NEIVA	E.S.E. HOSPITAL UNIVERSITARIO HERNANDO MONCALEANO PERDOMO DE NEIVA	CALLE 9 # 15-25	2.93223	-75.2812	Adult	28	Public
Huila	NEIVA	CLINICA UROS S.A.S - TORRE A	CRA 6 # 16-35	2.93458	-75.2898	Neonatal	18	Private
Huila	NEIVA	CLINICA UROS S.A.S - TORRE A	CRA 6 # 16-35	2.93458	-75.2898	Pediatric	5	Private
Huila	NEIVA	CLINICA UROS S.A.S - TORRE A	CRA 6 # 16-35	2.93458	-75.2898	Adult	34	Private
Huila	NEIVA	CLINICA BELO HORIZONTE	CALLE 8 N. 50 - 19	2.93358	-75.2478	Adult	10	Private
Huila	NEIVA	SOCIEDAD CLINICA CARDIOVASCULAR CORAZON JOVEN S.A.	CALLE 9 NO. 7 -38	2.92869	-75.2866	Adult	8	Private
Huila	PITALITO	ESE HOSPITAL DEPARTAMENTAL SAN ANTONIO DE PITALITO	CALLE 3SUR #1B-45	1.84547	-76.0503	Adult	10	Public
La Guajira	MAICAO	GYO MEDICAL IPS S.A.S.	CALLE 16 NUEVO HOSPITAL	11.3821	-72.2659	Adult	8	Private
La Guajira	MAICAO	SOCIEDAD MEDICA CLINICA MAICAO S.A	CALLE 16 No 6-41	11.3815	-72.2345	Adult	12	Private
La Guajira	RIOHACHA	CENTRO DIAGNOSTICO DE ESPECIALISTAS LTDA	Calle 13 No. 11 - 75	11.5449	-72.9122	Adult	17	Private
La Guajira	RIOHACHA	UNIDAD DE CUIDADOS INTENSIVOS RENACER LIMITADA	calle 14a n 11-09	11.5429	-72.9114	Pediatric	2	Private
La Guajira	RIOHACHA	UNIDAD DE CUIDADOS INTENSIVOS RENACER LIMITADA	calle 14a n 11-09	11.5429	-72.9114	Adult	8	Private
La Guajira	RIOHACHA	GYO MEDICAL IPS S.A.S.	CARRERA 12 CALLE 11A ESQUINA	11.5468	-72.9138	Pediatric	5	Private
La Guajira	RIOHACHA	CLINIVIDA Y SALUD IPS SAS	CALLE 11 Nº 15 - 55	11.547	-72.9157	Adult	11	Private
La Guajira	RIOHACHA	CENTRAL DE ESPECIALIDADES HOSPITALARIAS Y QUIRURGICAS S.A.S.	CALLE 12 # 10-108	11.5466	-72.9114	Adult	3	Private
La Guajira	SAN JUAN DEL CESAR	GYO MEDICAL IPS S.A.S.	Calle 4 entre Carrera 4 y 5 Hospital	10.7654	-73.0048	Adult	7	Private
La Guajira	SAN JUAN DEL CESAR	CLINICA SAN JUAN BAUTISTA S.A.S.	CALLE 7 No. 1-74	10.7706	-73.0111	Pediatric	3	Private
La Guajira	SAN JUAN DEL CESAR	CLINICA SAN JUAN BAUTISTA S.A.S.	CALLE 7 No. 1-74	10.7706	-73.0111	Adult	15	Private
Magdalena	CIENAGA	FUNDACION POLICLINICA CIENAGA	CL 8 No. 12 - 26	11.0115	-74.2503	Adult	10	Private
Magdalena	EL BANCO	PREVENCION Y SALUD IPS LIMITADA	CALLE 7 No. 17-05	9.00701	-73.9723	Adult	8	Private
Meta	GRANADA	Hospital Departamental de Granada - Empresa Social del Meta	calle 15 entre 2 y 4	3.54714	-73.6968	Adult	8	Public
Meta	VILLAVICENCIO	INVERSIONES CLINICA DEL META S.A.	CALLE 33 NO. 36-50	4.14447	-73.6368	Pediatric	5	Private
Meta	VILLAVICENCIO	INVERSIONES CLINICA DEL META S.A.	CALLE 33 NO. 36-50	4.14447	-73.6368	Adult	15	Private
Meta	VILLAVICENCIO	HOSPITAL DEPARTAMENTAL DE VILLAVICENCIO E.S.E.	CALLE 37 N.28-53	4.14481	-73.6437	Pediatric	4	Public
Meta	VILLAVICENCIO	HOSPITAL DEPARTAMENTAL DE VILLAVICENCIO E.S.E.	CALLE 37 N.28-53	4.14481	-73.6437	Adult	8	Public
Meta	VILLAVICENCIO	CORPORACION CLINICA	CL 36 35-70	4.14785	-73.6393	Adult	20	Private
Meta	VILLAVICENCIO	ANGIOGRAFIA DE COLOMBIA S.A.S.	CARRERA 40 # 33 - 08	4.14301	-73.6399	Adult	12	Private
Meta	VILLAVICENCIO	NUEVA CLINICA EL BARZAL S.A.S	CARRERA 37 No. 35-17	4.14835	-73.6381	Adult	7	Private
Meta	VILLAVICENCIO	ESTUDIOS E INVERSIONES MEDICAS S A ESIMED S A	Calle 24 No 39-48	4.13741	-73.6373	Neonatal	4	Private
Meta	VILLAVICENCIO	SERVICIOS MEDICOS INTEGRALES DE SALUD SAS SERVIMEDICOS SAS	CALLE 32 No.40A-40	4.14225	-73.6403	Adult	58	Private
Meta	VILLAVICENCIO	SERVICIOS MEDICOS INTEGRALES DE SALUD SAS SERVIMEDICOS SAS	CALLE 32 No.40A-40	4.14225	-73.6403	Adult	58	Private
Nariño	IPIALES	HOSPITAL CIVIL DE IPIALES ESE	Cra 1 No 4A- 142 Este - Avenida Panamericana	0.828745	-77.6139	Adult	17	Public
Nariño	IPIALES	SOCIEDAD LAS LAJAS S.A.S.	KR 6 # 24-122	0.832038	-77.649	Adult	6	Private
Nariño	PASTO	CLINICA NUESTRA SEÑORA DE FATIMA S.A.	CALLE 21 NUMERO 26 40	1.21733	-77.2765	Adult	5	Private
Nariño	PASTO	HOSPITAL INFANTIL LOS ANGELES	KR 32 # 21 A 30	1.22301	-77.2802	Pediatric	12	Private
Nariño	PASTO	FUNDACION HOSPITAL SAN PEDRO	CL16 KR43 ESQ	1.224	-77.2913	Adult	14	Private
Nariño	PASTO	PROFESIONALES DE LA SALUD S.A. "PROINSALUD S.A."	CALLE 14 Nº 34-24 SAN IGNACIO	1.21865	-77.2864	Adult	8	Private
Nariño	PASTO	UNIDAD CARDIOQUIRURGICA DE NARIÑO SAS	Carrera 36 No 16 B 64	1.22377	-77.2859	Adult	18	Private
Nariño	PASTO	E.S.E. HOSPITAL UNIVERSITARIO DEPARTAMENTAL DE NARIÑO	Calle 22No. 7-93	1.20505	-77.2681	Adult	20	Public
Nariño	PASTO	CORPORACION PARA LA SALUD INTEGRAL S.A.S. - CORPOSALUD S.A.S.	CRA 32 # 17-32	1.22074	-77.2818	Adult	8	Private
Nariño	PASTO	CLINICA ONCOLOGICA AURORA SAS	CRA. 34 No. 11A 12 piso 2-3-5	1.21593	-77.2878	Adult	9	Private
Nariño	PASTO	COMPAÑIA OPERADORA CLINICA HISPANOAMERICA SAS	Carrera 41 No. 19D - 147	1.23136	-77.2856	Adult	9	Private
Nariño	PASTO	CENTRO DE CUIDADOS CARDIONEUROVASCULARES PABON SAS	CARRERA 33 No. 12A-44 LOCAL 601 PISO 6 EDIFICIO CLINICA SAN IGNACIO	1.21335	-77.2961	Pediatric	10	Private
Nariño	PASTO	CENTRO DE CUIDADOS CARDIONEUROVASCULARES PABON SAS	CARRERA 33 No. 12A-44 LOCAL 601 PISO 6 EDIFICIO CLINICA SAN IGNACIO	1.21335	-77.2961	Adult	65	Private
Nariño	TUQUERRES	COOPERATIVA DE SERVICIOS INTEGRALES DE SALUD RED MEDICRON IPS	CALLE 27 NUMERO 14 - 58	1.21895	-77.2698	Adult	7	Private
Norte de Santander	CUCUTA	CLINICA SAN JOSE DE CUCUTA SA	CALLE 13 # 1E-74 B. LOS CAOBOS	7.88536	-72.4967	Pediatric	3	Private
Norte de Santander	CUCUTA	CLINICA SAN JOSE DE CUCUTA SA	CALLE 13 # 1E-74 B. LOS CAOBOS	7.88536	-72.4967	Adult	37	Private
Norte de Santander	CUCUTA	CLINICA SANTA ANA S.A.	AVENIDA 11E # 8 - 41	7.89104	-72.4891	Adult	11	Private
Norte de Santander	CUCUTA	CLINICA NORTE S.A.	AV 1 Nº 18-11	7.87927	-72.4983	Adult	6	Private
Norte de Santander	CUCUTA	CLINICA MEDICO QUIRURGICA S.A	CALLE 6N 11E - 123 BARRIO SANTA LUCIA	7.90544	-72.4911	Adult	17	Private
Norte de Santander	CUCUTA	DUMIAN MEDICAL S.A.S	A 11E NUMERO 8 - 41	7.89104	-72.4891	Pediatric	4	Private
Norte de Santander	CUCUTA	MEDICAL DUARTE ZF S.A.S	Cl 0n esq 16e 20 av libertadores 0 71 brr las brisas lote 2 - Parques Residenciales III	7.89936	-72.485	Pediatric	8	Private
Norte de Santander	CUCUTA	MEDICAL DUARTE ZF S.A.S	Cl 0n esq 16e 20 av libertadores 0 71 brr las brisas lote 2 - Parques Residenciales III	7.89936	-72.485	Adult	45	Private
Norte de Santander	CUCUTA	UCIS DE COLOMBIA S.A.S.	AVENIDA 11E # 5AN-71 PISO 2 BARRIO GUAIMARAL	7.90402	-72.4911	Pediatric	5	Private
Norte de Santander	CUCUTA	UCIS DE COLOMBIA S.A.S.	AVENIDA 11E # 5AN-71 PISO 2 BARRIO GUAIMARAL	7.90402	-72.4911	Adult	30	Private
Norte de Santander	OCAÑA	VITAL MEDICAL CARE VIMEC S.A.S	Calle 7 Nº 29 - 144 piso 2	8.26816	-73.3631	Pediatric	2	Private
Norte de Santander	OCAÑA	VITAL MEDICAL CARE VIMEC S.A.S	Calle 7 Nº 29 - 144 piso 2	8.26816	-73.3631	Adult	6	Private
Norte de Santander	PAMPLONA	HOSPICLINIC DE COLOMBIA S.A.S.	CARRERA 9A No 5-01	7.37477	-72.6447	Adult	8	Private
Putumayo	PUERTO ASIS	Hospital de Alta Complejidad del Putumayo S.A.S ZOMAC	CARRERA 48 No 10-29	0.504411	-76.4833	Adult	21	Private
Quindío	ARMENIA	EMPRESA SOCIAL DEL ESTADO HOSPITAL DEPARTAMENTAL UNIVERSITARIO DEL QUINDIO SAN JUAN DE DIOS	AVENIDA BOLIVAR 17 NORTE ESQUINA	4.55616	-75.6568	Adult	17	Public
Quindío	ARMENIA	ONCOLOGOS DEL OCCIDENTE S.A.S.	CALLE 1A # 12 - 36	4.54505	-75.661	Adult	5	Private
Quindío	ARMENIA	SOCIEDAD CARDIOVASCULAR DEL EJE CAFETERO S.A.	CRA 12 1A NORTE 20 PISO 3 LOC 301 -304	4.54728	-75.6622	Adult	4	Private
Quindío	ARMENIA	DUMIAN MEDICAL S.A.S	Carrera 12 # 0 - 75	4.52943	-75.6746	Pediatric	1	Private
Quindío	ARMENIA	DUMIAN MEDICAL S.A.S	Carrera 12 # 0 - 75	4.52943	-75.6746	Adult	8	Private
Quindío	ARMENIA	CLINICA CENTRAL DEL QUINDIO SAS	CARRERA 13 N° 1 N 35	4.54485	-75.6615	Adult	10	Private
Quindío	ARMENIA	CLINICA LA SAGRADA FAMILIA SAS	CRA 15 CLL 10 ESQ	4.53853	-75.6683	Neonatal	10	Private
Quindío	ARMENIA	CLINICA LA SAGRADA FAMILIA SAS	CRA 15 CLL 10 ESQ	4.53853	-75.6683	Adult	24	Private
Quindío	ARMENIA	CLINICA LA SAGRADA FAMILIA SAS	CRA 15 CLL 10 ESQ	4.53853	-75.6683	Pediatric	5	Private
Risaralda	DOSQUEBRADAS	UCIMED S.A	CALLE 18 nO. 19A-18	4.81691	-75.693	Adult	4	Private
Risaralda	PEREIRA	CAJA DE COMPENSACION FAMILIAR DE RISARALDA COMFAMILIAR RISARALDA	AV CIRCUNVALAR # 3-01	4.8074	-75.6806	Neonatal	4	Private
Risaralda	PEREIRA	CAJA DE COMPENSACION FAMILIAR DE RISARALDA COMFAMILIAR RISARALDA	AV CIRCUNVALAR # 3-01	4.8074	-75.6806	Pediatric	5	Private
Risaralda	PEREIRA	CAJA DE COMPENSACION FAMILIAR DE RISARALDA COMFAMILIAR RISARALDA	AV CIRCUNVALAR # 3-01	4.8074	-75.6806	Adult	19	Private
Risaralda	PEREIRA	CLINICA LOS ROSALES S.A	CRA 9 # 25-25	4.81355	-75.6997	Pediatric	3	Private
Risaralda	PEREIRA	CLINICA LOS ROSALES S.A	CRA 9 # 25-25	4.81355	-75.6997	Adult	18	Private
Risaralda	PEREIRA	ONCOLOGOS DEL OCCIDENTE S.A.S.	calle 50 N 13-10	4.81196	-75.7216	Adult	11	Private
Risaralda	PEREIRA	EMPRESA SOCIAL DEL ESTADO HOSPITAL UNIVERSITARIO SAN JORGE	Kr 4 No. 24-88	4.81803	-75.6988	Pediatric	5	Public
Risaralda	PEREIRA	EMPRESA SOCIAL DEL ESTADO HOSPITAL UNIVERSITARIO SAN JORGE	Kr 4 No. 24-88	4.81803	-75.6988	Adult	26	Public
Risaralda	PEREIRA	LIGA CONTRA EL CANCER SECCIONAL RISARALDA	CRA 4 # 23-55	4.81744	-75.6977	Adult	6	Private
Risaralda	PEREIRA	DUMIAN MEDICAL S.A.S	CALLE 9 Nº 20-60 ED. PINARES MEDICA CUARTO PISO	4.80185	-75.6867	Adult	9	Private
Risaralda	PEREIRA	Sociedad Comercializadora De Insumos y Servicios Médicos S.A.S	Carrera 25 #74 A 87	4.80163	-75.7414	Adult	8	Private
Risaralda	PEREIRA	Sociedad Comercializadora De Insumos y Servicios Médicos S.A.S	CALLE 12 # 18-50	4.80455	-75.6902	Pediatric	2	Private
Risaralda	PEREIRA	Sociedad Comercializadora De Insumos y Servicios Médicos S.A.S	CALLE 12 # 18-50	4.80455	-75.6902	Adult	23	Private
San Andrés y Providencia	SAN ANDRES	Empresa Social del Estado Hospital Departamental de San Andrés Providencia y Santa Catalina	VIA SAN LUIS SECTOR BAHIA HOOKER	12.5716	-81.7092	Neonatal	3	Public
San Andrés y Providencia	SAN ANDRES	Empresa Social del Estado Hospital Departamental de San Andrés Providencia y Santa Catalina	VIA SAN LUIS SECTOR BAHIA HOOKER	12.5716	-81.7092	Adult	9	Public
San Andrés y Providencia	SAN ANDRES	Empresa Social del Estado Hospital Departamental de San Andrés Providencia y Santa Catalina	VIA SAN LUIS SECTOR BAHIA HOOKER	12.5716	-81.7092	Adult	9	Public
Santa Marta	SANTA MARTA	CLINICA DE LA MUJER S.A.	CALLE 22 No. 21-16	11.2357	-74.1903	Neonatal	6	Private
Santa Marta	SANTA MARTA	CLINICA DE LA MUJER S.A.	CALLE 22 No. 21-16	11.2357	-74.1903	Adult	4	Private
Santa Marta	SANTA MARTA	CLINICA DE LA MUJER S.A.	CALLE 22 No. 21-16	11.2357	-74.1903	Adult	4	Private
Santa Marta	SANTA MARTA	CLINICA LA MILAGROSA S.A.	CALLE 22 # 13a-09	11.2385	-74.2025	Pediatric	1	Private
Santa Marta	SANTA MARTA	CLINICA LA MILAGROSA S.A.	CALLE 22 # 13a-09	11.2385	-74.2025	Adult	13	Private
Santa Marta	SANTA MARTA	COMPAÑIA COLOMBIANA DE SALUD COLSALUD S.A	CRA 19 CALLE 22 ESQUINA	11.2369	-74.1948	Pediatric	5	Private
Santa Marta	SANTA MARTA	UNIDAD DE ATENCION DE PACIENTES EN ESTADO CRITICO CUIDADO CRITICO S.A.S	CALLE 23 No. 18 A - 103	11.2365	-74.1952	Adult	16	Private
Santa Marta	SANTA MARTA	SOCIEDAD MEDICA DE SANTA MARTA S.A.S.	CL 26 KR 5 ESQ	11.237	-74.2108	Adult	13	Private
Santa Marta	SANTA MARTA	EMPRESA SOCIAL DEL ESTADO HOSPITAL UNIVERSITARIO JULIO MENDEZ BARRENECHE	Calle 23 CARRERA 14 ESQUINA	11.2373	-74.2018	Pediatric	3	Public
Santa Marta	SANTA MARTA	EMPRESA SOCIAL DEL ESTADO HOSPITAL UNIVERSITARIO JULIO MENDEZ BARRENECHE	Calle 23 CARRERA 14 ESQUINA	11.2373	-74.2018	Adult	38	Public
Santa Marta	SANTA MARTA	CLINICA BENEDICTO S.A	CALLE 23 No.14-46	11.2375	-74.2011	Adult	12	Private
Santa Marta	SANTA MARTA	PERFECT BODY MEDICAL CENTER LTDA	CARRERA 20 N° 15 -110	11.2393	-74.192	Adult	4	Private
Santa Marta	SANTA MARTA	INVERSIONES AZALUD S.A.S	KARRERA 19 28C - 09	11.2331	-74.1948	Adult	2	Private
Santa Marta	SANTA MARTA	CENTROS HOSPITALARIOS DEL CARIBE S.A.S.	CALLE 22 #15-34	11.2376	-74.2004	Pediatric	2	Private
Santa Marta	SANTA MARTA	CENTROS HOSPITALARIOS DEL CARIBE S.A.S.	CALLE 22 #15-34	11.2376	-74.2004	Adult	13	Private
Santa Marta	SANTA MARTA	Clínica Avidanti Santa Marta	Cra 4 No 26A - 71	11.2352	-74.2129	Adult	19	Private
Santander	BARRANCABERMEJA	UNIDAD CLINICA LA MAGDALENA SAS	calle 50 NO 24-37	7.0605	-73.8541	Pediatric	1	Private
Santander	BARRANCABERMEJA	UNIDAD CLINICA LA MAGDALENA SAS	calle 50 NO 24-37	7.0605	-73.8541	Adult	3	Private
Santander	BARRANCABERMEJA	UNIDAD CLINICA LA MAGDALENA SAS	calle 50 NO 24-37	7.0605	-73.8541	Pediatric (Burning)	1	Private
Santander	BARRANCABERMEJA	SALUD VITAL DE COLOMBIA IPS S.A.S	CARRERA 17 57 119	7.06791	-73.8613	Adult	9	Private
Santander	BUCARAMANGA	CLINICA MATERNO INFANTIL SAN LUIS S.A	CALLE 48 # 25 56	7.11668	-73.1161	Pediatric	6	Private
Santander	BUCARAMANGA	CLINICA MATERNO INFANTIL SAN LUIS S.A	CALLE 48 # 25 56	7.11668	-73.1161	Adult	7	Private
Santander	BUCARAMANGA	EMPRESA SOCIAL DEL ESTADO HOSPITAL UNIVERSITARIO DE SANTANDER	CARRERA 33 # 28 - 126	7.12804	-73.114	Pediatric	6	Public
Santander	BUCARAMANGA	EMPRESA SOCIAL DEL ESTADO HOSPITAL UNIVERSITARIO DE SANTANDER	CARRERA 33 # 28 - 126	7.12804	-73.114	Adult	53	Public
Santander	BUCARAMANGA	EMPRESA SOCIAL DEL ESTADO HOSPITAL UNIVERSITARIO DE SANTANDER	CARRERA 33 # 28 - 126	7.12804	-73.114	Adult (Burning)	13	Public
Santander	BUCARAMANGA	EMPRESA SOCIAL DEL ESTADO HOSPITAL UNIVERSITARIO DE SANTANDER	CARRERA 33 # 28 - 126	7.12804	-73.114	Pediatric (Burning)	8	Public
Santander	BUCARAMANGA	CLINICA CHICAMOCHA S.A	Calle 40 # 27A - 22	7.12066	-73.1148	Pediatric	1	Private
Santander	BUCARAMANGA	CLINICA CHICAMOCHA S.A	Calle 40 # 27A - 22	7.12066	-73.1148	Adult	18	Private
Santander	BUCARAMANGA	CLINICA CHICAMOCHA S.A	AVENIDA GONZALEZ VALENCIA No 55B-10	7.11004	-73.1116	Adult	10	Private
Santander	BUCARAMANGA	SERVICLINICOS DROMEDICA S.A	CL 11# 27-48	7.13697	-73.1199	Adult	12	Private
Santander	BUCARAMANGA	LOS COMUNEROS HOSPITAL UNIVERSITARIO DE BUCARAMANGA	CARRERA 27 Nº 30-15	7.1261	-73.1181	Adult	17	Private
Santander	BUCARAMANGA	CLINICA DE URGENCIAS BUCARAMANGA S.A.S	CARRERA 33 Nº 53-27	7.11143	-73.11	Adult	17	Private
Santander	BUCARAMANGA	COOPERATIVA MULTIACTIVA DE SERVICIOS INTEGRALES GESTIONARBIENESTAR	CALLE 35 NO. 24-28	7.12125	-73.1191	Adult	9	Private
Santander	FLORIDABLANCA	FUNDACION CARDIOVASCULAR DE COLOMBIA	CALLE 155 A # 23 58	7.07278	-73.1101	Pediatric	3	Private
Santander	FLORIDABLANCA	FUNDACION CARDIOVASCULAR DE COLOMBIA	CALLE 155 A # 23 58	7.07278	-73.1101	Adult	69	Private
Santander	FLORIDABLANCA	VIVASALUD I.P.S S.A.S FLORIDABLANCA	CARRERA 8 # 3 - 30 PISO 2	7.06391	-73.0869	Adult	8	Private
Santander	FLORIDABLANCA	FUNDACION OFTALMOLOGICA DE SANTANDER - FOSCAL	Calle 155 A No. 23 - 09, Autopista a Floridablanca	7.07316	-73.1104	Pediatric	3	Private
Santander	FLORIDABLANCA	FUNDACION OFTALMOLOGICA DE SANTANDER - FOSCAL	Calle 155 A No. 23 - 09, Autopista a Floridablanca	7.07316	-73.1104	Adult	20	Private
Santander	FLORIDABLANCA	FUNDACION FOSUNAB	CALLE 158 No. 20-95	7.06999	-73.1152	Adult	40	Private
Santander	PIEDECUESTA	FUNDACION CARDIOVASCULAR DE COLOMBIA	FINCA CASA LA LOMA KILOMETRO 7 VIA PIEDECUESTA FLORIDABLANCA VEREDA MENSULI	7.03596	-73.0686	Pediatric	10	Private
Santander	PIEDECUESTA	FUNDACION CARDIOVASCULAR DE COLOMBIA	FINCA CASA LA LOMA KILOMETRO 7 VIA PIEDECUESTA FLORIDABLANCA VEREDA MENSULI	7.03596	-73.0686	Adult	76	Private
Santander	PIEDECUESTA	FUNDACION CARDIOVASCULAR DE COLOMBIA	FINCA CASA LA LOMA KILOMETRO 7 VIA PIEDECUESTA FLORIDABLANCA VEREDA MENSULI	7.03596	-73.0686	Adult (Burning)	6	Private
Santander	PIEDECUESTA	FUNDACION CARDIOVASCULAR DE COLOMBIA	FINCA CASA LA LOMA KILOMETRO 7 VIA PIEDECUESTA FLORIDABLANCA VEREDA MENSULI	7.03596	-73.0686	Pediatric (Burning)	4	Private
Santander	PIEDECUESTA	CLINICA PIEDECUESTA S.A.	CARRERA 11 # 6-48 BARRIO SAN RAFAEL	6.98951	-73.0481	Adult	7	Private
Santander	SOCORRO	ESE HOSPITAL REGIONAL MANUELA BELTRAN	CRA 16 No. 9-53	6.46674	-73.2639	Adult	3	Public
Santander	SOCORRO	ESE HOSPITAL REGIONAL MANUELA BELTRAN	CRA 16 No. 9-53	6.46674	-73.2639	Adult (Burning)	1	Public
Santander	SOCORRO	CORPO MEDICAL SAS	CARRERA 16 NO 9-53	6.46674	-73.2639	Pediatric	2	Private
Santander	SOCORRO	CORPO MEDICAL SAS	CARRERA 16 NO 9-53	6.46674	-73.2639	Adult	10	Private
Sucre	COROZAL	UCI LAS MERCEDES DE COROZAL SAS	CLL 33 N 31-65	9.32118	-75.2884	Adult	8	Mixta
Sucre	SINCELEJO	CLINICA SANTA MARIA SAS	CARRERA 22 No. 16A-47	9.30648	-75.3937	Neonatal	11	Private
Sucre	SINCELEJO	CLINICA SANTA MARIA SAS	CARRERA 22 No. 16A-47	9.30648	-75.3937	Pediatric	8	Private
Sucre	SINCELEJO	CLINICA SANTA MARIA SAS	CARRERA 22 No. 16A-47	9.30648	-75.3937	Adult	28	Private
Sucre	SINCELEJO	HOSPITAL UNIVERSITARIO DE SINCELEJO E.S.E	KR 14 16B 100	9.3041	-75.4001	Adult	23	Public
Sucre	SINCELEJO	OFTALMOLOGOS ASOCIADOS DE LA COSTA SAS	CARRERA 25B No. 25 -152	9.30068	-75.3858	Adult	9	Private
Sucre	SINCELEJO	CLINICA SALUD SOCIAL S.A.S	CARRERA 16 No. 27A-74	9.29598	-75.397	Adult	21	Private
Sucre	SINCELEJO	CLINICA LAS PEÑITAS S.A.S	CARRERA 25 No. 23-26	9.30265	-75.3889	Adult	4	Private
Sucre	SINCELEJO	FUNDACION CLINICA INTEGRAL SINCELEJO	CALLE 20 No. 23 - 29	9.30443	-75.3919	Adult	10	Private
Sucre	SINCELEJO	SOCIEDAD CARDIOVASCULAR DEL CARIBE COLOMBIANO S.A.S	KR 22 No. 14 - 45, PISO 3	9.3072	-75.394	Adult	16	Private
Sucre	SINCELEJO	CLINICA PEDIATRICA NIÑO JESUS S.A.S	KRA 20 Nº 14-38	9.30695	-75.395	Pediatric	7	Private
Sucre	SINCELEJO	FUNDACION MARIA REINA	CL 27 No 18 - 50	9.29844	-75.3936	Adult	4	Private
Sucre	SINCELEJO	CLINICA ESPECIALIZADA LA CONCEPCION S.A.S	CALLE 38 N° 52-249	9.30717	-75.3701	Pediatric	12	Private
Sucre	SINCELEJO	CLINICA ESPECIALIZADA LA CONCEPCION S.A.S	CALLE 38 N° 52-249	9.30717	-75.3701	Adult	20	Private
Sucre	SINCELEJO	IPS VIDA PLENA S.A.S	CALLE 19 NO 22 - 41	9.30502	-75.3927	Adult	12	Private
Tolima	CHAPARRAL	MEINTEGRAL S.A.S	CL 11 CON CR 9 HOSPITAL SAN JUAN BAUTISTA 1er Piso	3.72683	-75.4845	Adult	7	Private
Tolima	ESPINAL	CRITICAL CARE GROUP IPS	Calle 4 No. 6 - 29	4.15231	-74.879	Adult	14	Private
Tolima	HONDA	MEDICINA INTENSIVA DEL TOLIMA S.A.	calle 9 No 22a-193	5.19922	-74.7514	Adult	9	Private
Tolima	IBAGUE	CLINICA ASOTRAUMA SAS	CRA 4D #32-34	4.43817	-75.2201	Adult	7	Private
Tolima	IBAGUE	AVIDANTI SAS	CALLE 103 Nro. 20-80 SUR FRACCION APARCO	4.4121	-75.1725	Adult	35	Private
Tolima	IBAGUE	CLINICA IBAGUE S.A	CRA 5 #12-15	4.44516	-75.2394	Adult	9	Private
Tolima	IBAGUE	MEDICADIZ S.A.S	CARRERA 12 SUR # 93-21	4.42523	-75.1764	Adult	10	Private
Tolima	IBAGUE	HOSPITAL FEDERICO LLERAS ACOSTA E.S.E.	CALLE 33 #4A-50	4.43376	-75.2197	Pediatric	6	Public
Tolima	IBAGUE	HOSPITAL FEDERICO LLERAS ACOSTA E.S.E.	CALLE 33 #4A-50	4.43376	-75.2197	Adult	43	Public
Tolima	IBAGUE	SOCIEDAD MEDICOQUIRURGICA DEL TOLIMA SOCIEDAD ANONIMA Y/O CLINICA TOLIMA S.A.	KR 1 # 12 - 22	4.4418	-75.2418	Neonatal	4	Private
Tolima	IBAGUE	SOCIEDAD MEDICOQUIRURGICA DEL TOLIMA SOCIEDAD ANONIMA Y/O CLINICA TOLIMA S.A.	KR 1 # 12 - 22	4.4418	-75.2418	Adult	14	Private
Tolima	IBAGUE	UNIDAD MATERNO INFANTIL DEL TOLIMA S.A.	Clle. 43 No. 4-26 Lc. 106 Ed. CENTRO MEDICO JAVERIANO	4.43093	-75.2102	Pediatric	1	Private
Tolima	IBAGUE	UNIDAD MATERNO INFANTIL DEL TOLIMA S.A.	CRA 7 No 65A-01 URBANIZACION LOS PARRALES	4.43868	-75.1997	Adult	8	Private
Tolima	IBAGUE	SOCIEDAD N.S.D.R. S.A.S	CARRERA 10 SUR CON CALLE 66 A - 70 GLORIETA VARSOVIA	4.43055	-75.1998	Adult	12	Private
Tolima	IBAGUE	CLINICA INTERNACIONAL DE ALTA TECNOLOGIA CLINALTEC S.A.S.	KM 6 VIA IBAGUE - ESPINAL SECTOR PICALEÑA	4.37529	-75.1168	Pediatric	4	Private
Tolima	IBAGUE	CLINICA INTERNACIONAL DE ALTA TECNOLOGIA CLINALTEC S.A.S.	KM 6 VIA IBAGUE - ESPINAL SECTOR PICALEÑA	4.37529	-75.1168	Adult	10	Private
Tolima	IBAGUE	SHARON MEDICAL GROUP SAS	CARRERA 5 #74-03	4.44037	-75.1858	Adult	13	Private
Tolima	IBAGUE	MEINTEGRAL S.A.S	Cra 12 Sur #93-21 VIA AEROPUERTO PERALES CLINICA MEDICADIZ SEDE SAMARIA PISO 2 Y 6 ALA ORIENTE	4.42494	-75.1764	Adult	10	Private
Tolima	LIBANO	MEINTEGRAL S.A.S	Cl 4 N. 1 - 111 Hospital Regional del Libano quinto piso	4.92088	-75.058	Pediatric	2	Private
Tolima	LIBANO	MEINTEGRAL S.A.S	Cl 4 N. 1 - 111 Hospital Regional del Libano quinto piso	4.92088	-75.058	Adult	10	Private
Tolima	MARIQUITA	CLINICA TRAUMANORTE SAS	CARRERA 5 N° 14-46	5.19031	-74.8926	Adult	7	Private
Valle del cauca	CARTAGO	UCIMED S.A	CARRERA 3 BIS CALLES 1 Y 2	4.75166	-75.9023	Adult	7	Private
Valle del cauca	GUADALAJARA DE BUGA	FUNDACION HOSPITAL SAN JOSE DE BUGA	CRA 8 # 17-52	3.90671	-76.2922	Adult	22	Private
Valle del cauca	GUADALAJARA DE BUGA	CLINICA UCI DEL RIO S.A.	CL 1 # 14-34	3.89513	-76.3037	Adult	8	Private
Valle del cauca	PALMIRA	CLINICA PALMIRA S.A.	CRA 31 # 31-62	3.52896	-76.3013	Adult	8	Private
Valle del cauca	PALMIRA	Clinica Palma Real S.A.S	Cra 28 N° 44-35	3.54022	-76.2975	Adult	12	Private
Valle del cauca	PALMIRA	GYO MEDICAL IPS SAS	Cra 29 N0 39 51	3.53641	-76.2981	Pediatric	2	Private
Valle del cauca	PALMIRA	GYO MEDICAL IPS SAS	Cra 29 N0 39 51	3.53641	-76.2981	Adult	13	Private
Valle del cauca	PALMIRA	Clínica de Alta Complejidad Santa Bárbara S.A.S	Calle 31 No 44-239 Torre Empresarial	3.52823	-76.3159	Adult	18	Private
Valle del cauca	TULUA	E.S.E HOSPITAL DEPARTAMENTAL TOMAS URIBE URIBE DE TULUA EMPRESA SOCIAL DEL ESTADO	CALLE 27 CRA 39	4.08172	-76.1881	Adult	45	Public
Valle del cauca	TULUA	CLINICA SAN FRANCISCO S.A	CALLE 26 # 34-60	4.08379	-76.1905	Adult	18	Private
Valle del cauca	TULUA	DUMIAN MEDICAL S.A.S	KR 40 CL 26 LA VARIANTE	4.08314	-76.1864	Pediatric	2	Private
Valle del cauca	TULUA	DUMIAN MEDICAL S.A.S	KR 40 CL 26 LA VARIANTE	4.08314	-76.1864	Adult	21	Private
