# Supplementary material
Source: Research Square preprint supplement (doi:10.21203/rs.3.rs-10233105/v1)
Supplement: Supplementary file 3 [file fa7c3044d43522d82d067f95.xlsx]

## Sheet: SM2
Route	Origin Hospital	Origin Hospital Address	Origin Hospital Latitude	Origin Hospital Longitude	Destination Hospital	Destination Hospital Address	Destination Hospital Latitude	Destination Hospital Longitude	Origin–Destination Distance (km)	Ambulance-Reported Time (minutes)	Time Estimated by This Study’s Model (minutes)	Absolute Error (Minutes)	Relative Error (%)
1	SERVICIO INTEGRAL DE MEDICINA AMBULATORIA - SIMA.LINK S.A.S	CALLE 13 # 29 - 41 Piso 4.	5.348806904384614	-72.39147380857469	Clinica Medicenter Ficubo	Cra. 23 #12-43, Yopal, Casanare	5.346764148563787	-72.39588286394644	1	5	4.3	0.7	5.14286
2	GYO MEDICAL I.P.S. S.A.S.	Calle 15 N° 7 - 95 - 2° piso	5.34168091007753	-72.40751516383045	Hospital Departamental de Villavicencio	Hospital Departamental de Villavicencio, Carrera 45 A #104b-59, Villavicencio, Meta	4.1438396450547055	-73.64465109860862	253	240	231	9	24.6667
3	CLINICA MEDICENTER FICUBO SAS	CRA 23 N. 12-43	5.346764148563787	-72.39588286394644	Hospital Departamental de Villavicencio	Hospital Departamental de Villavicencio, Carrera 45 A #104b-59, Villavicencio, Meta	4.1438396450547055	-73.64465109860862	252	210	231.4	21.4	9.81308
4	INVERSIONES CLINICA DEL META S.A.	CALLE 33 NO. 36-50	4.144662210635995	-73.6368538216241	Hospital Departamental de Villavicencio	Hospital Departamental de Villavicencio, Carrera 45 A #104b-59, Villavicencio, Meta	4.1438396450547055	-73.64465109860862	2025-03-01	6	6.3	0.3	20
5	CORPORACION CLINICA	Calle 36 # 35-70, Barrio Barzal, Villavicencio - Colombia	4.148010507567995	-73.63933496395224	SERVICIOS MEDICOS INTEGRALES DE SALUD SAS SERVIMEDICOS SAS	Cl 32 #40 40a, Villavicencio, Meta	4.142526417662959	-73.64029627744459	2025-01-01	6	4.2	1.8	1.33333
6	ANGIOGRAFIA DE COLOMBIA S.A.S.	CARRERA 40 # 33 - 08	4.143103304634242	-73.64028016395224	Hospital Departamental de Villavicencio	Hospital Departamental de Villavicencio, Carrera 45 A #104b-59, Villavicencio, Meta	4.1438396450547055	-73.64465109860862	1	3	2.94	0.06	48
7	SERVICIOS MEDICOS INTEGRALES DE SALUD SAS SERVIMEDICOS SAS	CALLE 32 No.40A-40	4.142526417662959	-73.64029627744459	Hospital Departamental de Villavicencio	Hospital Departamental de Villavicencio, Carrera 45 A #104b-59, Villavicencio, Meta	4.1438396450547055	-73.64465109860862	1	5	2.94	2.06	0.427184
8	Hospital de Alta Complejidad del Putumayo S.A.S ZOMAC	CARRERA 48 No 10-29	0.5045078121240958	-76.48328780628123	Fundación Hospital San Pedro	a 13-187, Cra. 43a #13-173, Pasto, Nariño	1.2241469945901933	-77.29129946395486	218	330	194.4	135.6	0.433628
9	ESE HOSPITAL SAN VICENTE DE ARAUCA	CALLE 15 CRA 16 ESQUINA	7.082226897621157	-70.75309496393324	CLINICA MEDICENTER FICUBO SAS	CRA 23 N. 12-43	5.346764148563787	-72.39588286394644	365	390	318.6	71.4	3.46218
10	HOSPITAL DEPARTAMENTAL MARIA INMACULADA ESE	DG 20No 7-93	1.6079827660094832	-75.60782435046326	CLINICA MEDILASER S.A.S.	CALLE 6 No. 14A-55 BARRIO JUAN XXIII	1.6079934906204492	-75.60784580813502	30.2	30	24.6	5.4	3.55556
11	CLINICA MEDILASER S.A.S.	CALLE 6 No. 14A-55 BARRIO JUAN XXIII	1.6079934906204492	-75.60784580813502	HOSPITAL DEPARTAMENTAL MARIA INMACULADA ESE	DG 20No 7-93	1.6079827660094832	-75.60782435046326	30.3	30	19.9	10.1	0.970297
12	UNIDAD DE CUIDADOS INTENSIVOS NEONATAL DEL BAJO SINU	Cra 26 #17-124B	8.734195193027572	-75.87612643322815	CLINICA MATERNO INFANTIL CASA DEL NIÑO S.A.S	CALLE 39 N° 6 - 15	8.761016659965230	-75.87845269328790	2025-02-04	10	5.2	4.8	0.0833333
13	CLINICA MATERNO INFANTIL CASA DEL NIÑO S.A.S	CALLE 39 N° 6 - 15	8.761016659965230	-75.87845269328790	UNIDAD DE CUIDADOS INTENSIVOS NEONATAL DEL BAJO SINU	KR 26 #17-124 HOSPITAL SAN VICENTE DE PAUL DE LORICA	8.734195193027572	-75.87612643322815	2025-02-04	10	5.2	4.8	0.0833333
14	CLINICA MONTERIA S.A	Carrera 4ta N° 60-35	8.771562218839760	-75.86781126441790	CLINICA LA ESPERANZA DE MONTERIA S.A.S.	CL 12 No. 4 - 58	8.745248348087280	-75.89165013974370	2025-06-05	15	7.2	7.8	0.0769231
15	HOSPITAL PABLO TOBON URIBE	CALLE 78B N° 69-240	6.277268019457822	-75.57985592161185	FUNDACION HOSPITALARIA SAN VICENTE DE PAUL	CALLE 64 CON CARRERA 51 D	6.262757977010157	-75.56555066208887	3	10	5.8	4.2	0.380952
16	FUNDACION COLOMBIANA DE CANCEROLOGIA CLINICA VIDA	CARRERA 50 A Nº 64-42	6.240216203324358	-75.57921165229943	HOSPITAL PABLO TOBON URIBE	CALLE 78B N° 69-240	6.277268019457822	-75.57985592161185	4.8	12	11.1	0.9	11.3333
17	NUEVA CLINICA SAGRADO CORAZON S.A.S	CL 49 # 35 - 61	6.242983106723163	-75.55726267558133	FUNDACION HOSPITALARIA SAN VICENTE DE PAUL	CALLE 64 CON CARRERA 51 D	6.262757977010157	-75.56555066208887	3.5	10	13.8	3.8	2.63158
18	FUNDACION HOSPITALARIA SAN VICENTE DE PAUL	CALLE 64 CON CARRERA 51 D	6.262757977010157	-75.56555066208887	HOSPITAL PABLO TOBON URIBE	CALLE 78B N° 69-240	6.277268019457822	-75.57985592161185	3	5.5	6.48	0.98	5.61224
19	CLINICA SAN RAFAEL LTDA	CALLE 20 # 16-42, SABANALARGA, ATLÁNTICO	10,6297692026935	-74,9201017388494	IPS CLINICA REINA CATALINA S.A.S.	CALLE 82 No 47-12, BARRANQUILLA, ATLÁNTICO	11,0016008879511	-74,8162106038098	46	65	65.8	0.8	81.25
20	IPS CLINICA REINA CATALINA S.A.S.	CALLE 82 No 47-12, BARRANQUILLA, ATLÁNTICO	11,0016008879511	-74,8162106038098	CLINICA REINA CATALINA BARANOA	KM 1 FINCA LOS NAVARRITOS, BARANOA, ATLÁNTICO	10,807937715864	-74,9160422620023	27	30	24.6	5.4	3.55556
21	CLINICA MEDICO QUIRURGICA SAN PEDRO CLAVER SAS	CARRERA 22 # 10A-86, MALAMBO, ATLÁNTICO	10,8538787962625	-74,7772831822801	CLINICA LOS ALMENDROS	CRA 18D # 80A-24, SOLEDAD, ATLÁNTICO	10,9186056451314	-74,8165414911498	16	20	16.74	3.26	4.13497
22	CLINICA MATERNO INFANTIL CASA DEL NIÑO S.A.S	CALLE 39 N° 6 - 15, MONTERIA, CORDOBA	8,76095616972351	-75,8784348506666	CLINICA CENTRO	CALLE 40 NO 41 - 110, BARRANQUILLA, ATLÁNTICO	10,9818135385693	-74,7818265560032	338	420	308.8	111.2	1.77698
23	HOSPITAL DEPARTAMENTAL DE VILLAVICENCIO E.S.E.	CALLE 37 N.28-53, VILLAVICENCIO, META	4,14481137773266	-73,6437429194987	DISAMA MEDIC S.A.S. CLINICA LA MISERICORDIA	CALLE 80 No. 46-44, BARRANQUILLA, ATLÁNTICO	10,999484932512	-74,8138639042132	1091	1440	1206	234	4.15385
24	SOCIEDAD MEDICA CLINICA MAICAO S.A	CALLE 16 No 6-41, MAICAO, GUAJIRA	11,3815026288541	-72,2345313421091	CLINICA SAN MARTIN BARRANQUILLA.	CARRERA 43 70-106, BARRANQUILLA, ATLÁNTICO	10,9912249562504	-74,8056781686041	346	360	352.8	7.2	48
25	HOSPITAL DEPARTAMENTAL DE VILLAVICENCIO E.S.E.	CALLE 37 N.28-53, VILLAVICENCIO, META	4,14481137773266	-73,6437429194987	HOSPITAL UNIVERSITARIO SAN IGNACIO	CARRERA 7 # 40 62, BOGOTÁ, CUNDINAMARCA	4,62850882102939	-74,0643070578097	114	120	106.8	13.2	7.09091
26	CLINICA DE MARLY JORGE CAVELIER GAVIRIA SAS	AV PASEO DE LOS ZIPAS VDA BOJACA LT 20 Y 23, CHIA, CUNDINAMARCA	4,87482546401089	-74,0365580603698	FUNDACIÓN CARDIO INFANTIL	CALLE 163 A # 13 B 60, BOGOTÁ, CUNDINAMARCA	4,7414545733517	-74,0345178712596	23	20	19.8	0.2	98
27	ESE HOSPITAL UNIVERSITARIO DE LA SAMARITANA	CALLE 1 SUR N° 11-90, ZIPAQUIRA, CUNDINAMARCA	5,01640335157258	-74,0038655898942	HOSPITAL SAN RAFAEL	CRA 8 # 17 45 SUR, BOGOTÁ, CUNDINAMARCA	4,57635301025996	-74,0913475854676	48	95	80.4	14.6	4.50685
28	HOSPITAL CARDIOVASCULAR DE CUNDINAMARCA S.A	Cr 4 Este N° 31-88, SOACHA, CUNDINAMARCA	4,58249529104175	-74,2004562682411	HOSPITAL SAN JOSÉ	CALLE 10 No. 18 - 75, BOGOTÁ, CUNDINAMARCA	4,60304070979292	-74,0867256138866	20	20	25.86	5.86	3.41297
29	E.S.E. CENTRO DE SALUD LA CALERA	Cr. 3ª No. 6 - 10	4.715569570923201	-73.96920870463767	Fundacion Santa Fe de bogotá	Ak 7 #117-1	4.695573870909078	-74.0330662421822	55	60	48.9	11.1	3.40541
30	ESE HOSPITAL DIVINO NIÑO	a 4-109, Cra. 11 #4-1, Rivera, Huila	2.7797069980180606	-75.2605129318465	Hospital Universitario Hernando Moncaleano Perdomo	Cl. 9 #15-25, Neiva, Huila	2.932456540695619	-75.28112983162916	62	70	30.3	39.7	0.236776
31	Hospital Local de Puerto Asís	Cra. 29 #13-19, Puerto Asís, Putumayo	0.49601569661330536	-76.49618974883549	Hospital Maria Inmaculada E.S.E.	Cl. 20 #7-29, Florencia, Caquetá	1.764187491931796	-75.60427734917855	332	310	300.6	9.4	30.9787
32	Hospital De Dagua Jose Rufino Vivas	a 10-104,, Cra. 23 #10-2, Dagua, Valle del Cauca	3.656227343318531	-76.6859212892985	Hospital Universitario del Valle Evaristo García	Cl. 5 #36-08, El Sindicato, Cali, Valle del Cauca	3.430410769580174	-76.54492541999076	47	90	52.2	37.8	0.380952
